1 **Mitochondrial cyclophilin D promotes disease tolerance by licensing NK cell development**  
2 **and IL-22 production against influenza virus**

3  
4 Jeffrey Downey<sup>1</sup>, Haley E. Randolph<sup>2</sup>, Erwan Pernet<sup>1</sup>, Kim A. Tran<sup>1</sup>, Shabaana A. Khader<sup>3</sup>, Irah  
5 L. King<sup>1</sup>, Luis B. Barreiro<sup>2,4</sup> and Maziar Divangahi<sup>1\*</sup>

- 6  
7 1. Department of Medicine, Department of Pathology, Department of Microbiology & Immunology,  
8 McGill University Health Centre, McGill International TB Centre, Meakins-Christie Laboratories,  
9 McGill University, 1001 Decarie Boulevard, Montreal, Quebec, H4A 3J1, Canada.  
10 2. Genetics, Genomics, and Systems Biology, University of Chicago, Chicago, IL, USA.  
11 3. Department of Pathology and Immunology, Department of Molecular Microbiology, Washington  
12 University School of Medicine, St. Louis, MO, United States.  
13 4. Section of Genetic Medicine, Department of Medicine, University of Chicago, Chicago, IL, USA.

14  
15  
16  
17 Corresponding Author:

18 Maziar Divangahi, Ph.D.  
19 Associate Professor of Medicine  
20 RI-MUHC, Centre for Translational Biology  
21 Meakins-Christie Laboratories  
22 1001 Decarie Blvd,  
23 Block E (EM3.2248)  
24 Montreal, Quebec H4A 3J1  
25  
26 Tel: (514) 934-1934 Ext. 76431  
27 e-mail: [maziar.divangahi@mcgill.ca](mailto:maziar.divangahi@mcgill.ca)

28 **ABSTRACT**

29 Immunity to infectious disease involves a combination of host resistance, which eliminates the  
30 pathogen, and disease tolerance, which limits tissue damage. While the severity of most pulmonary  
31 viral infections, including influenza A virus (IAV), is linked to excessive inflammation, our  
32 mechanistic understanding of this observation remains largely unknown. Here we show that  
33 mitochondrial cyclophilin D (CypD) protects against IAV infection via disease tolerance. Mice  
34 deficient in CypD (*CypD*<sup>-/-</sup> mice) are significantly more susceptible to IAV infection despite  
35 comparable antiviral immunity. Instead, this susceptibility resulted from damage to the lung  
36 epithelial barrier caused by a significant reduction of IL-22 production by conventional NK cells  
37 in IAV-infected *CypD*<sup>-/-</sup> mice. Transcriptomic and functional data revealed that the compromised  
38 IL-22 production by NK cells resulted from dysregulated lymphopoiesis, stemming from increased  
39 cell death in NK cell progenitors, as well as the generation of immature NK cells that exhibited  
40 altered mitochondrial metabolism. Importantly, following IAV infection, administration of  
41 recombinant IL-22 abrogated pulmonary damage and enhanced survival of *CypD*<sup>-/-</sup> mice.  
42 Collectively, these results demonstrate a key role for CypD in NK cell-mediated disease tolerance.

43

44

45

46

47 **KEYWORDS:** Influenza, Disease Tolerance, Cyclophilin D, IL-22, NK cells, Lymphopoiesis

48

49

50

51 **INTRODUCTION:**

52 In response to any given infection, host resistance mechanisms are involved in preventing  
53 pathogen invasion or replication. These resistance mechanisms are a critical component of host  
54 defense to infection, yet they come with a considerable inflammatory cost that paradoxically  
55 threatens host fitness through excessive immunopathology. Thus, mechanisms of disease tolerance  
56 are required to mitigate tissue damage, restore organ function and counter the cost of anti-microbial  
57 inflammation (1-4).

58 Influenza A viruses (IAV) cause consistent and recurrent respiratory infections,  
59 responsible for approximately half a million deaths per annum globally, while also causing  
60 unpredictable and devastating pandemics. Severe and fatal IAV infections are more often triggered  
61 by a “cytokine storm” that contributes to a break in disease tolerance—characterized by destruction  
62 of the pulmonary epithelial/endothelial barrier and respiratory insufficiency—rather than  
63 ineffective host resistance (5-7). On the other hand, 16% of IAV infections are estimated to be  
64 asymptomatic (8) and similar observations have been made clinically during the COVID-19  
65 pandemic. Like influenza, deaths due to COVID-19 seem to be more often associated with a loss  
66 of disease tolerance (9, 10), suggesting that in certain individuals these mechanisms are sufficient  
67 to avoid severe disease manifestation. Thus, understanding disease tolerance responses against a  
68 variety of acute respiratory infections may uncover targetable pathways for novel  
69 immunotherapies.

70 IAV infections are short-lived and usually self-resolving within approximately 7-10 days,  
71 though inflammation can persist for weeks after infection. The early inflammatory response is  
72 marked by an influx of innate leukocytes into the infected lung and airways. While inflammatory  
73 monocyte-derived cells play important roles in host resistance and priming of the adaptive immune

74 response (11-13), they can jeopardize survival through immunopathology (14, 15).  
75 Mechanistically, our group recently highlighted the importance of the bioactive lipid leukotriene  
76 B<sub>4</sub> (LTB<sub>4</sub>) in inhibiting *in situ* proliferation of inflammatory monocyte-derived macrophages  
77 (IMM) to conserve pulmonary epithelial integrity (16). Equally, reduction of extracellular matrix  
78 (ECM) turnover during IAV infection, by inhibiting lung metalloprotease activity, protected mice  
79 by conserving epithelial structure (17). Thus, maintenance of the pulmonary architecture and  
80 physiology is an essential component of host defense to IAV infection.

81         In addition to myeloid cells, innate lymphoid cells (ILCs), such as natural killer (NK) cells,  
82 accumulate in the lung shortly upon infection, beginning as early as 2 days post-infection (18). NK  
83 cells express a variety of activating and inhibitory receptors that perform diverse context- and  
84 tissue-specific functions, including well-described roles in the killing of virally-infected cells in a  
85 non-MHC-restricted manner through the production of IFN- $\gamma$  and expression of perforin and  
86 granzymes (19). In the context of IAV infection, NK cells contribute to host resistance by  
87 recognizing sialylated hemagglutinin (HA) proteins (20, 21) on the surface of IAV-infected cells  
88 to facilitate lysis (22-24). Beyond their cytotoxic role in host resistance, NK cells are equally  
89 critical in disease tolerance by secreting the epithelium-protective cytokine IL-22 (25). IL-22 is a  
90 member of the IL-10 family of cytokines that maintains mucosal barriers by inducing survival and  
91 proliferation of epithelial cells. Although several cell types are capable of producing IL-22—  
92 including NKT cells,  $\gamma\delta$  T-cells, ILC3s and  $\alpha\beta$  T-cells (26, 27)—conventional NK cells have been  
93 suggested to be the major source following IAV infection (28), particularly at later time-points  
94 (29). Consistently, *Il22*<sup>-/-</sup> mice exhibit enhanced epithelial damage and pulmonary pathology in  
95 response to IAV (26, 29, 30). However, our understanding of the mechanisms involved in the  
96 production of IL-22 by NK cells in this setting is incomplete.

97 Mitochondrial Cyclophilin D (CypD), encoded in the nucleus by the *Peptidyl-prolyl*  
98 *isomerase F (Ppif)* gene, is a member of the cyclophilin family of isomerases that resides within  
99 the mitochondrial matrix. CypD is well-known as an essential modulator of the mitochondrial  
100 permeability transition pore (MPTP) which is required for the induction of necrosis (31-33). Given  
101 the regulatory role of CypD in macrophage necrosis (32, 33) and the importance of conserved  
102 macrophage viability/function in immunity to IAV (34-36), we initially hypothesized that the loss  
103 of CypD-mediated necrosis would enhance macrophage viability and, thus, protection to IAV  
104 infection. Surprisingly, CypD-deficient mice were highly susceptible to IAV infection without  
105 aberrations in host resistance mechanisms or leukocyte necrosis. A lack of IL-22 production by  
106 conventional NK cells in the infected airways of *CypD*<sup>-/-</sup> mice was the major cause of  
107 susceptibility, as exogenous reconstitution of *CypD*<sup>-/-</sup> mice with IL-22, or transfer of wild type  
108 (WT), but not CypD-deficient, NK cells into *Il22*<sup>-/-</sup> mice significantly improved disease tolerance.  
109 RNA-seq of purified NK cells from IAV-infected mice revealed a unique transcriptome in CypD-  
110 deficient NK cells, marked by an immature profile (37). We found that CypD promotes NK cell  
111 responses at two levels: (1) by preventing cell death of NK cell progenitors in the bone marrow  
112 to facilitate NK cell hematopoiesis; and (2) by regulating peripheral NK cell metabolism, which is  
113 required for the conversion of immature to mature NK cells (38). Collectively, our findings  
114 highlight an essential role for CypD in NK cell-mediated disease tolerance to acute IAV infection.  
115  
116

117 **RESULTS:**

118

119 **CypD is required for host defense to influenza A virus infection by promoting disease**  
120 **tolerance**

121         Given the requirement of CypD in necrosis (31, 32) and the relationship between influenza  
122 A virus (IAV) pathogenesis and cell death (34), we postulated that *CypD*<sup>-/-</sup> mice are more  
123 resistance to IAV infection. We first infected WT and *CypD*<sup>-/-</sup> mice with an LD<sub>50</sub> (90 PFU) dose  
124 of PR8 IAV. *CypD*<sup>-/-</sup> mice were highly susceptible to IAV infection, exhibiting increased mortality  
125 (**Fig. 1A**) and morbidity (**Fig. 1B**). To delineate the cause of mortality, we hereafter used a  
126 sublethal (50 PFU) dose of IAV. Interestingly, the enhanced susceptibility of *CypD*<sup>-/-</sup> mice was not  
127 due to differences in pulmonary necrosis (**Fig. S1A**) or host resistance, as *CypD*<sup>-/-</sup> mice had similar  
128 pulmonary viral loads (**Fig. 1C**) and levels of active type I IFN (IFN-I) in the lung (**Fig. 1D-E**;  
129 **Fig. S1B-C**). We next hypothesized that the susceptibility of *CypD*<sup>-/-</sup> mice was linked to impaired  
130 disease tolerance responses, leading to increased lung tissue damage and pulmonary inflammation.  
131 Following IAV infection, CypD-deficient mice exhibited enhanced pulmonary edema (**Fig. 1F**)  
132 and barrier damage, as there was significant increase in protein and erythrocyte influx into the  
133 BAL (**Fig. 1G-H**; **Fig. S1D**). Intranasal delivery of a fluorescently-labelled dextran molecule into  
134 infected mice further demonstrated a significant increase in lung epithelial/endothelial damage of  
135 *CypD*<sup>-/-</sup> mice through a collective loss of fluorescence in the lung over time (**Fig. 1I**). Both flow  
136 cytometry and H&E staining showed that this increased pulmonary damage was associated with  
137 elevated inflammatory cells in the parenchyma and airways of *CypD*<sup>-/-</sup> lungs (**Fig. 1J-L**) beginning  
138 at 7 days post-infection, which coincided with the onset of enhanced tissue damage in these mice.  
139 Using Masson's Trichrome stain, we equally observed enhanced collagen deposition and fibrosis

140 in the lungs of *CypD*<sup>-/-</sup> mice (**Fig. 1M-N**). Taken together, these data show that CypD is required  
141 in immunity to IAV by regulating disease tolerance, rather than host resistance.

### 142 **Immune, not stromal, cells are responsible for the susceptibility of *CypD*<sup>-/-</sup> mice to IAV**

143 Mechanisms of disease tolerance can be mediated by either structural or hematopoietic  
144 compartments (1, 3, 39). To delineate which cellular compartment was primarily responsible for  
145 the increased tissue damage in *CypD*<sup>-/-</sup> mice, we generated bone marrow chimeric mice, where the  
146 hematopoietic compartment of lethally irradiated CD45.1 WT mice was reconstituted with CypD-  
147 deficient (CD45.2) (*CypD*<sup>-/-</sup> → WT) bone marrow (BM) and vice versa (WT → *CypD*<sup>-/-</sup>). After 10-  
148 12 weeks, reconstitution efficiency was greater than 92% (**Fig. S2A**). For further analysis, we  
149 chose day 7 post-IAV infection to match the peak lung damage and initial mortality of the CypD-  
150 deficient mice (**Fig. 1**). Chimeric mice reconstituted with *CypD*<sup>-/-</sup> BM cells (*CypD*<sup>-/-</sup> → WT)  
151 showed a statistically significant increase in erythrocytes in the BAL and enhanced pulmonary  
152 inflammation and collagen deposition when compared to WT (**Fig. 2A-D; Fig. S2B**). These results  
153 indicate that the reduced disease tolerance in CypD-deficient mice is predominately mediated by  
154 the hematopoietic compartment.

155 To elucidate which cell(s) of the hematopoietic compartment is/are responsible for the  
156 increased lung damage, we extensively phenotyped innate immune cells by flow cytometry (**full**  
157 **gating strategy Fig. S1 E-F**) at various time points post-IAV infection in the lung parenchyma  
158 and airways. We and others have previously shown that elevated levels of IMM and neutrophils  
159 can compromise disease tolerance during IAV infection (11, 16). However, the kinetics of IMM  
160 and neutrophils in the BAL showed no significant differences in frequencies or numbers between  
161 WT and *CypD*<sup>-/-</sup> mice (**Fig. 2E-F**) and even showed a trending decrease in *CypD*<sup>-/-</sup> mice.

162 Interestingly, we found that the kinetics of NK cell accumulation in the airways differed between  
163 CypD-deficient and WT mice, with a significant reduction in the frequency of NK cells at day 7  
164 post-IAV infection in *CypD*<sup>-/-</sup> mice, which aligned with the pulmonary damage (**Fig. 2G**). No  
165 differences in any of the cell populations assessed were observed in the lung parenchyma (**Fig.**  
166 **S2C-E**), hinting at the importance of spatial lung immunity (i.e. parenchyma versus airways)  
167 during IAV infection.

### 168 **CypD-deficient NK cells are phenotypically immature**

169 NK cells are required for protection against IAV by regulating both host resistance and disease  
170 tolerance (23, 29). Correspondingly, a recent study suggested that altered kinetics of NK cells may  
171 underlie individual susceptibility to IAV, without affecting early viral loads (40). Thus, we next  
172 sought to further interrogate the role of NK cells in the susceptibility of CypD-deficient mice to  
173 IAV. NKp46/IAV HA interactions elicit cell lysis via perforin and granzyme to kill virally infected  
174 cells (21, 23). However, CypD-deficient and WT NK cells expressed similar levels of perforin and  
175 granzyme B (**Fig. 2H**), suggesting the lytic capacity of CypD-deficient NK cells was intact, as  
176 predicted given the similar viral loads in these mice. The maturation and accumulation of effector  
177 functions in NK cells is known to be dependent on downregulation of CD27 and upregulation of  
178 CD11b, which gives rise to four distinct populations of NK cells (CD27<sup>-</sup> CD11b<sup>-</sup>, CD27<sup>+</sup> CD11b<sup>-</sup>  
179 , CD27<sup>+</sup> CD11b<sup>+</sup>, CD27<sup>-</sup> CD11b<sup>+</sup>) (37, 41, 42). Unbiased single cell analysis has confirmed the  
180 existence of these populations and their importance in determining effector function of NK cells  
181 in mice (43). Intriguingly, *CypD*<sup>-/-</sup> NK cells exhibited a significantly higher frequency and number  
182 of immature (CD27<sup>+</sup> CD11b<sup>-</sup>) cells compared to fully mature (CD27<sup>-</sup> CD11b<sup>+</sup>) cells in the BAL  
183 (**Fig. 2I-J**), but not the lung (**Fig. S2F-G**) at day 7 post-IAV infection. Similar results as in the  
184 BAL were obtained in splenic NK cells at day 5 post-IAV infection (**Fig. S2H**). Collectively, our



185 results show that *CypD*-deficient mice have reduced accumulation of mature NK cells in the  
186 airways at the peak of IAV-induced immunopathology.

187 ***CypD*<sup>-/-</sup> NK cells have a unique transcriptional profile and metabolic program following IAV**  
188 **infection**

189 As NK cell kinetics and maturity differed between WT and *CypD*<sup>-/-</sup> mice following IAV  
190 infection, we next asked whether *CypD* was expressed in NK cells. To investigate this, we purified  
191 NK cells from WT and *CypD*-deficient spleens and found significant expression of *CypD* in WT,  
192 but not *CypD*<sup>-/-</sup> cells, both at steady-state and upon infection (**Fig. S3A**), which aligned with data  
193 publicly available from ImmGen (44). We then performed bulk RNA-seq on WT and *CypD*-  
194 deficient splenic NK cells isolated at day 5 post-IAV infection (**Table S1**). We chose day 5 post-  
195 infection, as splenic *CypD*<sup>-/-</sup> NK cells already exhibited an immature effector state when compared  
196 to WT (**Fig. S2H**). Principal component analysis (PCA) on the splenic WT and *CypD*<sup>-/-</sup> NK cell  
197 expression data revealed a strong signature of IAV infection, with non-infected and IAV-infected  
198 samples separating on PC1, which explains 56.3% of the variance in the dataset (**Fig. S3B**). Within  
199 the IAV-infected samples, we found 315 genes for which expression patterns significantly differed  
200 ( $|\log\text{FC}| > 0.5$ ,  $\text{FDR} < 0.10$ ) between WT and *CypD*<sup>-/-</sup> mice (**Fig. 3A; Table S2**), including *Ppif* in  
201 line with our qPCR data (**Fig. S3A**). Gene ontology (GO) enrichment analysis revealed that genes  
202 showing significantly higher expression in the WT mice ( $n = 146$ ) were enriched for pathways  
203 related to activation of the immune response ( $\text{FDR} = 4.3 \times 10^{-4}$ ), phagocytosis ( $\text{FDR} = 5.3 \times 10^{-5}$ ),  
204 wound healing ( $\text{FDR} = 4.1 \times 10^{-4}$ ), and blood coagulation ( $\text{FDR} = 5.3 \times 10^{-4}$ ) (**Fig. 3B; Table S3**),  
205 while genes more highly expressed in the *CypD*<sup>-/-</sup> mice ( $n = 169$ ) were enriched for oxidative  
206 phosphorylation (OXPHOS) ( $\text{FDR} = 2.5 \times 10^{-3}$ ), T cell mediated toxicity ( $\text{FDR} = 3.2 \times 10^{-3}$ ),  
207 porphyrin-containing compound metabolic processes ( $\text{FDR} = 5.1 \times 10^{-3}$ ), and peroxidase activity

208 (FDR =  $1.5 \times 10^{-4}$ ) (**Fig. 3C; Table S3**). In line with our observation that *CypD*<sup>-/-</sup> mice display  
209 significantly more immature (CD27<sup>+</sup>CD11b<sup>-</sup>) and fewer fully mature (CD27<sup>-</sup> CD11b<sup>+</sup>) NK cells,  
210 we found that genes previously associated with elevated expression in fully mature and  
211 intermediate-mature (CD27<sup>+</sup> CD11b<sup>+</sup>) NK cells (Chiossone et al., 2009) were significantly  
212 enriched among genes showing higher expression in WT compared to *CypD*<sup>-/-</sup> mice (**Fig. S3C**)  
213 and that key genes driving these enrichments exhibited lower expression in *CypD*<sup>-/-</sup> mice (**Fig.**  
214 **3D**).

215 Gene set enrichment analysis (GSEA) using the Molecular Signatures Database hallmark  
216 gene sets (45) highlighted a divergence in multiple metabolic and signaling pathways between WT  
217 and *CypD*<sup>-/-</sup> mice, including an enrichment for Wnt/ $\beta$ -catenin signaling among genes more highly-  
218 expressed in WT mice (FDR = 0.024) (**Fig. 3E; Table S3**), and enrichments for mTORC1  
219 signaling (FDR =  $3.3 \times 10^{-4}$ ) and OXPHOS (FDR =  $1.7 \times 10^{-4}$ ) among genes more highly-expressed  
220 in *CypD*<sup>-/-</sup> mice (**Fig. 3F-G; Table S3**), suggesting a distinct metabolic program in *CypD*-deficient  
221 NK cells. Concordant with our enrichment analyses, the average expression of genes belonging to  
222 the Wnt/ $\beta$ -catenin signaling pathway was significantly higher in WT compared to *CypD*<sup>-/-</sup> mice  
223 (**Fig. 3H**, t-test,  $p = 4.2 \times 10^{-3}$ ), while for the OXPHOS and mTORC1 signaling pathways, we  
224 observed a trend toward higher expression in the *CypD*<sup>-/-</sup> compared to WT mice (**Fig. S3D-E**, t-  
225 test,  $p = 0.06$  and  $p = 0.24$ , respectively).

226 The RNA-seq results underscored an immature effector transcriptome in *CypD*-deficient  
227 NK cells, including decreased expression of the Wnt/ $\beta$ -catenin signaling pathway that has been  
228 shown to be a critical in the progression to mature CD11b<sup>+</sup> NK cells (46), as well as an upregulation  
229 of OXPHOS and mTORC1 signaling, both of which have been implicated in immature effector  
230 states and impaired activation of NK cells (38, 47, 48). *CypD* is equally known to regulate ATP

231 synthase and OXPHOS through incompletely understood mechanisms (49). To see whether an  
232 enhanced OXPHOS pathway expression led to elevated mitochondrial respiration in CypD-  
233 deficient NK cells, we purified splenic NK cells and subjected them to the Seahorse assay. At  
234 steady-state, we detected no differences in OXPHOS in WT and *CypD*<sup>-/-</sup> NK cells (**Fig. S3F-I**).  
235 However, over the course of infection, we observed a significant increase in basal metabolic rate,  
236 maximal respiration and spare respiratory capacity in *CypD*<sup>-/-</sup> NK cells compared to WT (**Fig. 3I-**  
237 **P**). We also found an increase in healthy respiring and disrupted mitochondria in CypD-deficient  
238 NK cells at day 3 post-infection (**Fig. 3Q-S**), as well as enhanced mitochondrial ROS production  
239 (**Fig. 3T**), suggesting the elevated OXPHOS contributes to mitochondrial dysregulation. Taken  
240 together, RNA-seq, flow cytometry and functional data indicate that CypD within NK cells enables  
241 their maturation and regulates cellular metabolism.

#### 242 ***CypD* expression in NK cells promotes transcriptional pathways involved in wound healing** 243 **and hemostasis**

244 We next sought to dissect the transcriptional differences in functional immune-related  
245 pathways between WT and CypD-deficient NK cells following IAV infection. Numerous killer  
246 cell lectin-like receptor genes (*Klrl*) were significantly differentially-expressed between NK cells  
247 of WT and *CypD*<sup>-/-</sup> mice post-infection (**Fig. 3A**), including *Klrl2*, *Klrl8*, *Klrl17*, and *Klrl5*, among  
248 others, suggesting that the inhibitory and activating capacity of these NK cells may differ, which  
249 in turn may alter their functional capabilities. Indeed, the transcriptional immune response  
250 signatures of IAV-infected WT and *CypD*<sup>-/-</sup> NK cells were distinct from one another: genes  
251 displaying significantly higher expression in *CypD*<sup>-/-</sup> NK cells were enriched for antigen  
252 processing (FDR =  $7.8 \times 10^{-3}$ ) and T cell mediated cytotoxicity (FDR =  $3.2 \times 10^{-3}$ ) pathways (**Fig.**  
253 **4A; Table S3**), whereas genes more highly-expressed in WT NK cells were enriched for effector

254 functions related to phagocytosis and engulfment (FDR =  $1.1 \times 10^{-3}$ ) and complement-dependent  
255 cytotoxicity (FDR =  $8.0 \times 10^{-4}$ ) (**Fig. 4B; Table S3**). Notably, among genes more highly-expressed  
256 in WT NK cells, we also identified significant enrichments for multiple pathways involved in  
257 cytokine secretion, including IL-2 production (FDR =  $8.1 \times 10^{-3}$ ), IL-10 secretion (FDR =  $1.2 \times 10^{-3}$ )  
258 and production (FDR =  $5.6 \times 10^{-3}$ ), negative regulation of IL-13 secretion (FDR =  $6.8 \times 10^{-4}$ ), and  
259 chemokine secretion (FDR =  $1.8 \times 10^{-3}$ ), (**Fig. 4B; Table S3**), suggesting that *CypD*<sup>-/-</sup> NK cells  
260 display impaired anti-inflammatory cytokine production compared to WT NK cells. Finally, in  
261 agreement with our previous observation that the WT NK cell transcriptome was enriched for  
262 pathways involved in blood coagulation (**Fig. 3B**) and that *CypD*-deficient mice had enhanced  
263 hemorrhaging (**Fig. 1H; Fig. S1D**), genes upregulated in WT compared to *CypD*<sup>-/-</sup> cells were  
264 enriched for hemostasis (FDR =  $5.5 \times 10^{-4}$ ). Moreover, negative regulation of fibroblast growth  
265 factor production (FDR =  $1.5 \times 10^{-3}$ ) was enriched in WT NK cells, which might explain the reduced  
266 fibrosis in WT lungs following IAV infection (**Fig. 1M-N**). Interestingly, one gene significantly  
267 upregulated in this pathway in WT cells, *Cd59a*, has previously been shown to mediate protection  
268 against IAV, in part, via inhibiting pulmonary hemorrhaging and fibrosis in the lung (50),  
269 suggesting a complementary role of *CypD*. Finally, genes showing significantly higher expression  
270 in WT mice were more likely to be found in the tissue repair gene set (Yanai et al., 2016) than  
271 expected by chance (WT  $p = 0.009$ ), while no such enrichment was observed among genes more  
272 highly-expressed in *CypD*<sup>-/-</sup> mice (*CypD*<sup>-/-</sup>  $p = 0.798$ ) (**Fig. 4C**), further underscoring the role of  
273 *CypD* in mediating disease tolerance.

274

275

276 **CypD promotes NK cell hematopoiesis within bone marrow progenitors to generate mature**  
277 **peripheral NK cells**

278         Considering the functional role of CypD in cell death, the lack of developmentally mature  
279 NK cells in the airways of *CypD*<sup>-/-</sup> mice following IAV infection might be due to perturbations in  
280 local proliferation and/or cell death. To investigate these possibilities, we analyzed markers of  
281 proliferation (Ki67) and cell death (active caspase 3) by flow cytometry within NK cells in the  
282 BAL and found no differences (**Fig. 5A-B**). In addition to proliferation and cell death, aberrant  
283 recruitment or chemotaxis into the airways could explain the reduced number of mature NK cells  
284 in CypD-deficient mice. CCR2 expression on NK cells is known to specifically facilitate migration  
285 of NK cells into the airways, without affecting extravasation into the lung, which is instead  
286 mediated by CX3CR3 (18, 51). However, the frequency of CCR2<sup>+</sup> NK cells was indistinguishable  
287 between WT and *CypD*<sup>-/-</sup> mice in the BAL, lung and blood (**Fig. 5C; Fig. S4A-B**), confirming  
288 CCR2-mediated migration of NK cells into the airways is not dependent on CypD expression.

289         Although continual on-demand egress of NK cells from the BM into the blood to supply  
290 peripheral tissues is well-described, it is now known that an additional population of long-lived  
291 tissue-resident NK cells exists in several peripheral tissues that can be differentiated by expression  
292 of CD49a rather than CD49b (52). This population is most prevalent in the uterus, liver and skin,  
293 but can be found in a variety of other sites, including the lung (53). To see whether this population  
294 of tissue-resident NK cells was altered in our model, we investigated expression of CD49a versus  
295 CD49b on the surface of NK cells from WT and *CypD*<sup>-/-</sup> mice. The vast majority of NK cells from  
296 the BAL and lungs of both groups of mice were CD49b<sup>+</sup> CD49a<sup>-</sup>, indicative of a predominantly  
297 blood-derived population, and this frequency was the same between both groups (**Fig. 5D; Fig.**  
298 **S4C**). Thus, differences in blood-derived versus resident NK cells is not the reason for the altered

299 accumulation and effector states observed in *CypD*<sup>-/-</sup> mice. Interestingly, the frequency of NK cells  
300 in the peripheral blood was decreased in *CypD*-deficient mice (**Fig. 5E**), and there were less fully  
301 mature CD27<sup>-</sup> CD11b<sup>+</sup> cells at day 5 post-infection, but not at other time points (**Fig. 5F-G; Fig.**  
302 **S4D-E**), suggesting NK cell recruitment was altered in *CypD*<sup>-/-</sup> mice.

303         The reduction of fully mature NK cells in the blood and peripheral tissue led us to speculate  
304 that there was a defect in the generation of NK cells in the BM of *CypD*<sup>-/-</sup> mice. NK cell generation  
305 occurs through a stepwise progression of progenitors, ultimately giving rise to fully mature effector  
306 NK cells that are released into the bloodstream (**Fig. 6A**). Downstream of the pluripotent LKS  
307 population, cells of the lymphoid lineage and the myeloid/erythroid lineage separate through the  
308 common lymphoid progenitor (CLP; Lin<sup>-</sup> CD127<sup>+</sup> cKit<sup>lo</sup> Sca1<sup>lo</sup>) and the common myeloid  
309 progenitor (CMP; Lin<sup>-</sup> CD127<sup>-</sup> cKit<sup>+</sup> Sca1<sup>-</sup> CD34<sup>+</sup> CD16/32<sup>-</sup>), respectively. Deriving from the  
310 CLP, NK cells are generated first from the pre-NK progenitor (pre-NKP; Lin<sup>-</sup> CD127<sup>+</sup> CD27<sup>+</sup>  
311 CD122<sup>-</sup> CD244.2<sup>+</sup>), then the NKP (Lin<sup>-</sup> CD127<sup>+</sup> CD27<sup>+</sup> CD122<sup>+</sup> CD244.2<sup>+</sup>), which represents  
312 what is thought to be the first fully committed cell of the NK lineage, and finally *bona fide* NK  
313 cells that then begin to express Nkp46, CD49b and CD11b (54). To investigate any potential  
314 aberrations in NK cell development between WT and *CypD*<sup>-/-</sup> mice, we phenotyped the BM  
315 precursors beginning at the LKS population and working towards more committed progenitors,  
316 during homeostasis and upon infection. We observed no differences in the frequency or number  
317 of LKS cells between groups (**Fig. 6B; Fig. S4F**), nor in the CLP (**Fig. 6C; Fig. S4G**).  
318 Additionally, there were similar levels of the CMP and granulocyte-monocyte progenitor (GMP)  
319 in WT and *CypD*-deficient mice (**Fig. S4H-I**). However, beginning at the NK cell-specific  
320 progenitors, we observed a decrease in pre-NKP and NKP populations (**Fig. 6D-F**), as well as a  
321 lower frequency of fully mature CD11b<sup>+</sup> CD27<sup>-</sup> expressing NK cells in the BM upon infection

322 (Fig. 6G; Fig. S4J). Thus, CypD mediates NK cell hematopoiesis and an inability to progress  
323 through the NK cell lineage correlates with a lack of mature NK cells in the periphery.

324 ***CypD*<sup>-/-</sup> NK cell progenitors express higher levels of p53 and undergo enhanced cell death in**  
325 **the BM**

326 To investigate the potential mechanisms involved in the reduction of NK cell progenitors  
327 in the BM of *CypD*<sup>-/-</sup> mice, we evaluated both cellular proliferation and death (55, 56). Both at  
328 steady-state and upon infection, CypD had no effect on proliferation of NK cell progenitors, as  
329 determined by intracellular Ki67 expression (Fig. S4K-L). Interestingly, p53, a central regulator  
330 of cell growth arrest and cell death in a variety of cell types (57), has recently been demonstrated  
331 to interact with CypD in mitochondria to facilitate necrosis of structural cells (58), while also  
332 antagonizing p53-dependent growth arrest in a tumour model, suggesting that CypD-deficiency  
333 could increase p53 function (59). Moreover, enhanced expression or activity of p53 halts  
334 lymphopoiesis, causes cell death specifically in the lymphoid lineage and leads to lymphopenia  
335 (60, 61). We, thus, investigated the level of p53 in NK cell progenitors by flow cytometry and  
336 found elevated p53 protein in *CypD*<sup>-/-</sup> pre-NKPs (Fig. 6H) and NKPs (Fig. 6I), but not in effector  
337 NK cells in the BM (Fig. S4M) or BAL (Fig. S4N). Using differential expression of  
338 AnnexinV/NucSpot (a 7-AAD analogue), the upregulation of p53 correlated with an enhanced  
339 percentage of death (AnnexinV<sup>+</sup> NucSpot<sup>+</sup>) in NKP cells (Fig. 6J), but not in pre-NKP cells (Fig.  
340 S4O). Collectively, our results suggest that CypD antagonizes p53 function and prevents p53-  
341 mediated cell death to conserve NK cell lymphopoiesis and the generation of mature effector NK  
342 cells.

343 **Mice deficient in CypD are more susceptible to IAV due to a lack of IL-22 production by**  
344 **conventional NK cells**

345 Having established that CypD regulates NK cell hematopoiesis and that *CypD*<sup>-/-</sup> NK cells  
346 are more phenotypically immature with altered transcriptomic and metabolic profiles, we finally  
347 hypothesized that NK cells from these mice are functionally impaired and confer susceptibility to  
348 IAV infection. As our RNA-seq data indicated impaired anti-inflammatory cytokine production  
349 (e.g. IL-10) and wound healing/hemostasis pathways in CypD-deficient NK cells (**Fig. 4B-C**), we  
350 speculated that altered cytokine production was responsible for the heightened susceptibility and  
351 pulmonary tissue damage.

352 Upon IAV infection, NK cells are a well-known source of IFN- $\gamma$  (62, 63). However, the  
353 function of IFN- $\gamma$  in response to IAV is controversial (64-66) and its potential role in disease  
354 tolerance has not been studied. At day 7 post-IAV infection, we observed a significant decrease in  
355 the levels of IFN- $\gamma$  in the BAL of *CypD*<sup>-/-</sup> mice, which aligns with the increased pathology (**Fig.**  
356 **7A**). Utilizing *ex vivo* stimulation of cells with PMA/ionomycin, we confirmed by intracellular  
357 cytokine staining (ICS) that CD49b<sup>+</sup> NK cells from the BAL and spleen were substantial sources  
358 of IFN- $\gamma$ . At day 5 post-IAV infection, a significantly lower frequency of *CypD*<sup>-/-</sup> NK cells was  
359 IFN- $\gamma$ <sup>+</sup> (**Fig. 7B; Fig. S5A**). However, in line with a previous study (66), using *Ifngr*<sup>-/-</sup> mice, we  
360 found no role for IFN- $\gamma$  signaling in disease tolerance to IAV, with mice exhibiting similar amounts  
361 of protein and number of erythrocytes in the BAL (**Fig. S5B-C**), although a significant increase in  
362 total leukocytes was noted (**Fig. S5D**). To completely rule-out that the reduction in IFN- $\gamma$  was  
363 responsible for the damage in the CypD-deficient mice, we reconstituted the airways of WT and  
364 *CypD*<sup>-/-</sup> mice with 100ng of IFN- $\gamma$  intranasally (i.n.), or vehicle control, at 5 days p.i., collected the  
365 BAL at 7 days p.i and characterized pulmonary damage. As expected, we observed a significant



366 increase in protein and erythrocytes in the BAL of CypD-deficient mice that received PBS  
367 compared to WT mice, but there was no amelioration in either group that received IFN- $\gamma$  (**Fig S5E-**  
368 **F**). Collectively, these data confirm that, despite a reduction of NK cell-derived IFN- $\gamma$  in CypD-  
369 deficient airways post-IAV infection, IFN- $\gamma$  was not responsible for the break in disease tolerance.

370         The production of IL-22 by NK cells plays a key role in protection of barrier sites through  
371 the promotion of epithelial cell survival and proliferation, and is a correlate of immunity to IAV  
372 (29, 30). Importantly, CD27<sup>-</sup> NK cells, which are reduced in the BAL of *CypD*<sup>-/-</sup> mice, have been  
373 shown to be the major source of IL-22 with NK cell subpopulations (28). Thus, we postulated that  
374 a lack of IL-22 production by CypD-deficient NK cells was underlying their susceptibility to IAV  
375 infection. To assess this hypothesis, we began by confirming a previous study (30), showing that  
376 IL-22-deficient mice had enhanced lung damage, indicated by elevated protein and cell  
377 accumulation in the BAL, as well as pulmonary inflammation by histology at 7 days post-IAV  
378 infection (**Fig. S5G-I**). Next, we measured the level of IL-22 in the BAL of WT and *CypD*<sup>-/-</sup> mice  
379 at various time points p.i. and found a significant reduction of IL-22 in *CypD*<sup>-/-</sup> mice at 7 days p.i.  
380 (**Fig. 7C**). Moreover, as with IFN- $\gamma$ , we identified NK cells as an important source of IL-22 and  
381 there was a specific reduction of IL-22<sup>+</sup> NK cells in both the BAL and spleen of CypD-deficient  
382 mice compared to WT (**Fig. 7D; Fig. S5J**). These data collectively confirm the importance of  
383 CypD within CD49b<sup>+</sup> conventional NK cells in IL-22 production.

384         Because of the observation that IL-22 is involved in disease tolerance to IAV and that  
385 *CypD*<sup>-/-</sup> mice have reduced IL-22 in the airways, we investigated whether or not reconstitution of  
386 CypD-deficient mice with IL-22 could protect against IAV infection by limiting lung tissue  
387 damage. At 5 days post-lethal IAV infection, we intranasally reconstituted the airways of WT and  
388 *CypD*<sup>-/-</sup> mice with 100ng of IL-22 or PBS (**Fig. 7E**) and assessed mortality. As expected, *CypD*<sup>-/-</sup>

389 mice that received PBS were significantly more susceptible than WT mice that received PBS.  
390 Strikingly, after IAV infection, the survival of *CypD*-deficient mice that received exogenous IL-  
391 22 was significantly increased and comparable to both WT groups (**Fig. 7F**). This enhanced  
392 survival was independent of host resistance (**Fig. 7G**), but dependent on disease tolerance as the  
393 increased levels of erythrocyte influx and fibrosis were abrogated in the *CypD*-deficient mice (**Fig.**  
394 **7H-I; Fig. S5K**). Finally, having established the role of IL-22 in enhancing disease tolerance in  
395 *CypD*<sup>-/-</sup> mice, as well as an inability of *CypD*-deficient NK cells to produce IL-22, we sought to  
396 directly assess the capacity of WT versus *CypD*<sup>-/-</sup> NK cells to protect against tissue damage in an  
397 IL-22-deficient environment. To do this, we purified NK cells from naïve spleens of WT and  
398 *CypD*-deficient hosts, then transferred them (1x10<sup>5</sup> cells) intratracheally into infected *Il22*<sup>-/-</sup> hosts  
399 at 5 days post-IAV infection, as to not affect early viral replication or the onset of tissue damage.  
400 At 7 days p.i. (2 days post-transfer), we collected the BAL and lungs, then assayed damage and  
401 viral loads (**Fig. 7J**). We found that IL-22-deficient mice that received WT NK cells exhibited  
402 statistically significantly enhanced disease tolerance, as assessed by attenuated protein and  
403 erythrocyte accumulation in the BAL, while no improvement was noted in mice receiving *CypD*<sup>-/-</sup>  
404 NK cells compared to PBS controls (**Fig. 7K-L**). In line with IL-22 acting primarily on structural  
405 cells, no variance in total leukocyte counts was observed in any group (**Fig. 7M**). Furthermore, no  
406 differences in viral load between any group could be delineated; thus, disease tolerance, rather  
407 than host resistance, was responsible for the reduced airway damage (**Fig. 7N**). Collectively, these  
408 data indicate that NK cell-derived IL-22 is dependent upon *CypD* expression and is required for  
409 regulating disease tolerance following IAV infection.

410

411 **DISCUSSION**

412           The immune response to influenza requires a tightly regulated effort from both the innate  
413 and adaptive branches. Shortly following infection, early innate cells infiltrate the airways, and  
414 along with resident immune cells, coordinate to inhibit IAV replication and elimination (host  
415 resistance) from the lung. These host resistance mechanisms to IAV are well studied (67) and  
416 current influenza therapies, such as oseltamivir, exclusively target viral replication/dissemination  
417 to assist these pathways (68). However, host resistance comes at a substantial immunopathological  
418 cost that often is the cause of disease severity and mortality; therefore, limiting tissue damage and  
419 maintaining the functional capacity of the lung (disease tolerance) is critical for host survival.  
420 Breaks in disease tolerance cause mortality through loss of the integrity of the pulmonary  
421 epithelial/endothelial barrier, hemorrhaging and airway remodelling, all of which ultimately  
422 compromise gas exchange and lung physiology. Thus, the regulatory mechanisms of host defense  
423 against infection require a tight balance of generating immunity to resist a pathogen, while not  
424 compromising the physiology of infected organs that must be returned to homeostasis.

425           Disease tolerance as a defense strategy was initially established in plants (69) and has since  
426 been extended to mammals (1, 3). Evidence for its importance during chronic disease such as  
427 *Mycobacterium tuberculosis* and helminthic infections (70, 71) is accumulating, along with an  
428 understanding of the underlying mechanisms. Yet, our knowledge of disease tolerance pathways  
429 against acute viral infections like IAV remains limited. We and others have recently provided some  
430 insight into the importance of maintaining tissue integrity in disease tolerance to IAV either  
431 through the production of the host lipid mediator LTB<sub>4</sub> (16) or inhibition of pulmonary matrix  
432 metalloproteases (17). In the current study, we extend the fundamental observation that reducing  
433 tissue damage is essential in disease tolerance and we define an role for CypD in this process,

434 namely, by regulating NK cell generation in the bone marrow as well as promoting their effector  
435 functions in the airways. This work adds further evidence to our earlier studies that highlighted  
436 CypD as an essential component of lymphocyte-mediated host defense during infection (72, 73),  
437 in addition to its well-documented roles in necrosis (74) and the progression of neurological  
438 disorders, including multiple sclerosis (75).

439         The unique location of CypD within the mitochondrial matrix places it at the intersection  
440 of several essential cellular processes during health and disease. For example, in mature  
441 leukocytes, the mitochondrial antiviral signaling protein (MAVS) is anchored to the outer  
442 mitochondrial membrane and is essential for the induction of IFN-I in response to several viruses,  
443 including IAV. Although activation of the cytosolic pattern recognition receptor (PRR) RIG-I by  
444 viral RNA is the major trigger of MAVS-mediated responses, mitochondrial heat shock proteins,  
445 fission proteins and mitochondria-derived ROS critically regulate MAVS function (76).  
446 Additionally, IAV-encoded PB1-F2 localizes to the mitochondria and induces early intrinsic  
447 apoptosis to temper antiviral responses that is neutralized by the host NOD-like receptor NLRX1  
448 (Nucleotide-binding, leucine-rich repeat containing X1) within the mitochondrial matrix (35).  
449 During LCMV infection, enhanced mitochondrial oxidative phosphorylation promotes antiviral  
450 immunity by pDCs (77), while our recent study highlighted the importance of CypD-dependent  
451 metabolic changes in T cell responses to promote disease tolerance to *Mtb* (72). Thus,  
452 mitochondria are critical orchestrators of both resistance and tolerance mechanisms in ways that  
453 are cell- and pathogen-specific.

454         Although the majority of previous work has focused on mitochondria in mature leukocytes,  
455 this study also revealed a role for mitochondrial CypD in regulating lymphopoiesis and p53-  
456 associated progenitor cell death. In structural cells, p53, an essential regulator of cell survival and

457 death, was previously shown to translocate to the mitochondrial matrix and interact with CypD,  
458 resulting in necrotic cell death (58). Interestingly, enhancement of p53 activity specifically within  
459 lymphocyte progenitors has been shown to induce cell death and skew hematopoiesis towards  
460 myelopoiesis (60, 61). Our results uncovered a hitherto unappreciated inhibition of p53 by CypD  
461 in NK cell progenitors to promote lymphopoiesis, akin to the role previously described for Mym1  
462 and Mdm2 (60, 61). Importantly, we and others have described hematopoietic progenitor cell death  
463 as an emerging master regulator of bias between lymphopoiesis and myelopoiesis (55, 78, 79).  
464 Though no direct protein-protein interaction experiments between p53 and CypD were attempted  
465 in our study, it is intriguing to speculate that a balance between lymphopoiesis and myelopoiesis  
466 signals in progenitors may alter the outcome of p53/CypD interactions in the mitochondria, either  
467 by promoting or antagonizing p53-dependent lymphoid progenitor cell death as the leukocyte  
468 requirements change in the periphery. Certainly, more studies are required to fully delineate the  
469 contributions of CypD and p53 to hematopoiesis, as well as other known regulators such as Mym1  
470 and Mdm2.

471 In addition to our results in the bone marrow, we equally identified a function for CypD in  
472 mature NK cells that promotes their activation and function. NK cells are well known for their  
473 tumoricidal capacity and cytotoxicity against virally-infected cells, through an “innate” non-MHC  
474 restricted manner, which differs from cytolytic CD8 T cells (19). The importance of NK cells in  
475 the immune response to IAV is well-documented and appears to participate in both host resistance  
476 and disease tolerance. For example, complete genetic ablation of NK cells (via knockout of the  
477 transcription factor *Nfil3*; *Nfil3*<sup>-/-</sup> mice) (22), loss of the HA interacting receptor NKp46 (*Nkp46*<sup>-/-</sup>  
478 ) (23), or depletion using an anti-asialo GM1 antibody (24) all result in IAV-induced lethality and  
479 elevated viral titres in the lung. Thus, NK cells are required for host resistance to IAV through

480 HA/NKp46 cell lysis. While it has been recently shown that IL-22 production by NK cells limits  
481 pulmonary immunopathology during IAV infection (29), the regulatory mechanisms were  
482 unknown. Here, we found that CypD regulates IL-22 production by NK cells in the lung (**Fig. 7C-**  
483 **D; Fig. S5K**), while expression of perforin and granzyme B by NK cells (**Fig. 2H**) and viral load  
484 (**Fig. 1C**) were unaffected. Therefore, during the course of IAV infection, the functional capacity  
485 of NK cells is dynamic and can be changed from promoting resistance to tolerance.

486 Early NK cell responses, beginning at approximately 2 days post-IAV infection, appear to  
487 be mediated by NKp46 and are primarily concerned with restricting viral replication by killing  
488 infected cells, which correlates with the onset of symptoms. Thus, studies using mice that lack NK  
489 cells or NKp46 expression prior to the onset of infection show enhanced mortality coupled with  
490 increased viral loads (22-24). Following viral containment, NK cells may shift to a disease  
491 tolerance role that is marked by production of IL-22 beginning at around day 5 post-infection. Our  
492 results suggest that during the early phase of infection, the function of NK cells in host resistance  
493 is CypD-independent, while at the later stage of infection the function of NK cells in disease  
494 tolerance is mediated by CypD. As our RNA-Seq and functional data (**Fig. 3G; Fig. 3I-P**)  
495 highlighted elevated reliance on OXPHOS in *CypD*<sup>-/-</sup> NK cells compared to WT, we propose that  
496 a CypD-dependent metabolic shift in NK cells may, in part, dictate the transition of their effector  
497 program from host resistance to disease tolerance. Additional investigation is required to identify  
498 the intrinsic and/or extrinsic cues leading to the alteration in NK cell function during infection.

499 Greater consideration of the kinetics of infection may also serve to explain discrepancies  
500 in the source of IL-22 during IAV infection. IL-22 can be produced by several lymphocyte  
501 populations in response to IAV, including NK cells, NKT cells, ILCs and conventional  $\alpha\beta$  T-cells.  
502 Studies investigating the early phase of infection (i.e. 2 and 4 days p.i.) elucidated NKT and ILCs

503 as the major sources (26, 27), while our and other's work at the late phase of infection (i.e. day 5  
504 and day 7) (29) showed conventional NK cells as the major source of IL-22. Collectively, these  
505 results suggest that early IL-22 production is dominated by NKT cells and ILCs, while NK cells  
506 are contributing to host resistance. However, at later stages of infection there is a shift in the  
507 function of NK cells highlighted by a production of IL-22, which contributes to disease tolerance.  
508 Although speculative, this concept is supported by our adoptive transfer experiments of NK cells  
509 into IL-22-deficient mice, where we show that CypD-dependent production of IL-22 by NK cells  
510 is sufficient to promote disease tolerance against IAV infection. Whether or not CypD solely  
511 regulates IL-22 production in NK cells rather than other cell types, or if its role is IAV-specific  
512 remains unknown. Undoubtedly, further insight into the kinetics of the source of IL-22 during IAV  
513 infection and how leukocyte function changes over time are required to more completely  
514 understand this complex phenomenon.

515 Our results outline an important role for CypD in NK cell development in the bone marrow  
516 as well as NK cell function in the airways. Although our work indicates separate roles for CypD  
517 in bone marrow NK cell progenitors and in mature NK cells, the exact mechanisms by which CypD  
518 functions and whether these two phenotypes are connected or separate require further  
519 investigation. The usage of a conditional knockout, rather than a constitutive knockout used in this  
520 study, that specifically deletes CypD in either mature NK cells or in bone marrow progenitors,  
521 could help to address these questions. Alternatively, mounting evidence suggests that progenitors  
522 may be imprinted in the bone marrow and this signature may affect the function of terminally  
523 differentiated effector cells in a process termed "trained immunity" (80). Thus, NK cells in the  
524 periphery of *CypD*<sup>-/-</sup> mice may be imprinted with an immature phenotype because of the lack of  
525 CypD function in bone marrow NK cell progenitors. We have recently described systemic BCG

526 vaccination reprograms hematopoietic stem cells to promote myelopoiesis and generate more  
527 protective macrophage responses to subsequent *Mtb* infection (79, 81). Interestingly, NK cells  
528 have equally been shown to be “trained” by BCG (82), and memory NK cells are generated  
529 following IAV infection (22). Thus, it is possible that CypD may play a role in protective NK cell  
530 imprinting in the bone marrow. The potential of trained immunity during IAV infection is an  
531 exciting field for further research.

532         Influenza infections are persistent human pathogens, being responsible yearly for  
533 approximately 1 billion infections and between 300 000-500 000 deaths worldwide (68). Past IAV  
534 pandemics, as well as the current COVID-19 pandemic, have highlighted the importance of  
535 understanding host-pathogen interactions during acute respiratory infections. As we continue to  
536 better appreciate the interplay between host resistance (early responses) and disease tolerance (late  
537 responses), targeted therapies require an appropriate timeline for administration. For instance, our  
538 recent studies investigating host immunotherapy via the eicosanoid/IFN-I axis showed early  
539 inhibition of mPGES-1 (the enzyme involved in prostaglandin E<sub>2</sub> production) increased antiviral  
540 IFN- $\beta$  production to enhance host resistance (83). On the other hand, late-stage administration of  
541 exogenous LTB<sub>4</sub> potentiates immunomodulation of IFN- $\alpha$  signaling to promote disease tolerance,  
542 without affecting antiviral responses (16). Considering that higher levels of lung  
543 immunopathology, rather than viral replication, is the major cause of morbidity and mortality  
544 during severe SARS-CoV-2 and IAV infections (10, 84), therapies that target disease tolerance  
545 may provide a more universal benefit compared to specific antiviral therapies. Studies that outline  
546 novel pathways of disease tolerance are required and will contribute to the next generation of  
547 respiratory virus therapies.

548



549 **MATERIALS AND METHODS**

550 **Mice**

551 Six- to ten-week-old C57BL/6, CD45.1 and *Ifngr*<sup>-/-</sup> mice were purchased from Jackson  
552 Laboratories. *CypD*<sup>-/-</sup> mice were provided by M. Forte (Oregon Health and Science University,  
553 Portland, OR, USA). All animals were housed and inbred at the animal facility of the Research  
554 Institute of McGill University. Experiments were performed using age- and sex-matched mice.

555 **Viruses & Infection**

556 All *in vivo* infections were performed using mouse adapted influenza A/Puerto Rico/8/34 (H1N1)  
557 virus (IAV), kindly provided by Dr. Jonathan A. McCullers (St. Jude Children Research Hospital).  
558 Mice were challenged intranasally (in 25µL PBS) with IAV at a sublethal dose of 50 PFU or a  
559 lethal dose (LD<sub>50</sub>) of 90 PFU. 90 PFU was used for the survival experiments in **Fig. 1A** and **Fig.**  
560 **7F**. For all other experiments, 50 PFU was used. During survival experiments mice were monitored  
561 twice daily for signs of duress and weighed daily. Mice reaching 75% of original body weight  
562 were considered moribund and sacrificed. Viruses were propagated and isolated from Madin-  
563 Darby Canine Kidney (MDCK) cells and titrated using standard MDCK plaque assays. MDCK  
564 cells were obtained from the American Type Culture Collection and maintained in Dulbecco's  
565 modified Eagle medium enriched with 10% (v/v) FBS, 2 mM L-glutamine and  
566 100 U ml<sup>-1</sup> penicillin/streptomycin.

567

568

569 **Protein in the BAL**

570 BAL were collected by cannulating the trachea with a 22-gauge cannula, then washing the lungs  
571 with  $3 \times 1$  ml of cold, sterile PBS. The total volume recovered after lavage was  $\sim 0.7$  ml. Samples  
572 were spun down (1,500 r.p.m.; 10 min) and the total protein content was assessed by Pierce BCA  
573 Protein assay (Thermo Fisher Scientific).

574 **Texas Red-Dextran Lung Permeability**

575 WT and *CypD*<sup>-/-</sup> were infected for 7 days with 50 PFU. On day 7, mice were delivered 25 $\mu$ L of  
576 50mg/mL (1.25mg) Texas Red-Dextran (10 000 MW) intranasally. 1 hour later mice were  
577 sacrificed and lungs were carefully excised without damaging. Lungs were imaged using the In  
578 Vivo Xtreme (Bruker) using fluorescence capture. Resulting images were then analyzed for total  
579 fluorescent intensity of lung images using ImageJ software (National Institutes of Health). During  
580 the 1 hour of incubation Texas Red-Dextran molecules diffused into the blood of infected mice,  
581 due to the loss of epithelial/endothelial barrier integrity. Therefore, lower fluorescence is indicative  
582 of increased damage and compromised barrier integrity.

583 **Generation of chimeric mice**

584 CD45.1<sup>+</sup> B6 mice or *CypD*<sup>-/-</sup> mice were lethally irradiated with 9 Gy following 3 days of antibiotic  
585 treatment (0.5g Enrofloxacin (Bayer) per litre of drinking water). 16 hours later, the BM  
586 compartment was reconstituted with  $4 \times 10^6$  nucleated cells from either CD45.1<sup>+</sup> mice (*CypD*<sup>-/-</sup>  
587 recipient) or *CypD*<sup>-/-</sup> mice (CD45.1<sup>+</sup> recipient) and antibiotic treatment was maintained for 2  
588 additional weeks. Between 10-12 weeks post-injection, reconstitution was validated by flow  
589 cytometry and was  $>90\%$ . Mice were then infected for downstream assays.

## 590 **Flow Cytometry**

591 Lung tissues were perfused with 10 mL of PBS, harvested and minced before collagenase digestion  
592 ( $150 \text{ U mL}^{-1}$ ) for 1 h at  $37^\circ\text{C}$ . Lungs were passed on a  $40 \mu\text{m}$  nylon mesh, and red blood cells  
593 were lysed. For bone marrow staining, cells were isolated following aseptic flushing of the tibiae  
594 and femurs, and red blood cells were lysed. BAL were collected as previously described, spun  
595 down and red blood cells lysed. Spleens were aseptically removed, crushed on a  $40 \mu\text{m}$  nylon  
596 mesh, and red blood cells were lysed. Then total cell counts were determined with a  
597 hemocytometer. In some experiments BAL were counted prior to red blood cell lysis to enumerate  
598 erythrocyte influx into the airways and then red blood cells were lysed. For peripheral blood  
599 staining, the blood was collected by cardiac puncture in a BD Microtainer tube and stained  
600 extracellularly; red blood cells were then lysed.

601 Cells were initially stained with eFluor-506 viability dye in PBS (eBioscience; 20 min;  $4^\circ\text{C}$ ),  
602 washed and surface stained with anti-CD16/32 (BD Biosciences) in 0.5% BSA/PBS solution to  
603 block non-specific antibody interactions with Fc receptors (10 min;  $4^\circ\text{C}$ ). Cells were then surface  
604 stained with combinations of PE-CF594-conjugated anti-SiglecF, BUV395-conjugated anti-  
605 CD11b, PerCP-eFluor780- or AlexaFluor700-conjugated anti-Ly6G, fluorescein isothiocyanate  
606 (FITC)- or allophycocyanin (APC)-conjugated anti-Ly6C, APC-eFluor780-conjugated anti-F4/80,  
607 BV421-conjugated anti-CD11c, FITC- or BUV395-conjugated anti-CD45.2 or APC-conjugated  
608 anti-CD45.1, Pe-Cy7-conjugated anti-CD3, BV786-conjugated anti-CD127, APC- or BUV737-  
609 conjugated anti-NKp46, BV421-conjugated anti-CD49b, PE-conjugated anti-CD49a (all from BD  
610 BioScience, except anti-Ly6G from eBioscience), or PE-Cy7-conjugated (BD Biosciences) or  
611 FITC-conjugated (eBioscience) anti-CD27. Cells were then fixed with 1% PFA for 1 hour, washed  
612 and acquired in 0.5% BSA/PBS solution.

613 In some experiments, following extracellular staining, samples were stained intracellularly for  
614 Ki67, active Caspase 3, perforin, granzyme B or p53. For APC-conjugated anti-Ki67, or anti-  
615 perforin and PE-conjugated anti-active Caspase 3, or anti-granzyme B (all from BD Biosciences)  
616 cells were initially fixed and permeabilized using BD Cytotfix/Cytoperm (BD Biosciences) for 30  
617 minutes at 4° C and then stained for 1 hour. Cells were washed and acquired. For p53 staining,  
618 cells were initially fixed and permeabilized for 1 hour using the Foxp3/Transcription Factor  
619 Staining Buffer Set (eBioscience) and then stained using the PE-conjugated anti-p53 Set (BD  
620 Biosciences), according to the manufacturer's instructions. The provided PE-conjugated isotype  
621 was used as a control.

622 In experiments involving bone marrow progenitors, cells were processed, counted, stained for  
623 viability and blocked as before. Cells were then stained with biotin conjugated anti-Ly6C/G, anti-  
624 CD5, anti-B220, anti-Ter119, anti-CD4 and anti-CD8 for 20 minutes at 4° C. Cells were then  
625 washed and stained with APC-Cy7-conjugated streptavidin, APC-conjugated anti-cKit, PE-Cy7-  
626 conjugated Sca-1 for LKS cells. For CMP/GMP experiments, cells were not blocked and instead  
627 FITC-conjugated anti-CD34 and PerCP-eFluor780-conjugated anti-CD16/32 (all from BD  
628 Biosciences, except anti-CD16/32 from eBioscience) were added to the previous cocktail. For NK  
629 cell progenitors, PE-CF594-conjugated anti-CD122 and BUV395-conjugated anti-CD244.2 were  
630 added along with anti-CD27 and anti-CD127 (BD Biosciences) as previously described.

631 Finally, for experiments involving intracellular cytokine staining (ICS),  $2 \times 10^6$  single splenocytes  
632 or BAL cells were incubated for 4 hours at 37° C in the presence of PMA/Ionomycin and Brefeldin  
633 A (Cell Activation Cocktail; BioLegend) or GolgiPlug control (BD Biosciences). Cells were then  
634 stained extracellularly, fixed and permeabilized using BD Cytotfix/Cytoperm (BD Biosciences),

635 before being stained intracellularly for PE-conjugated anti-IL-22 and APC-conjugated anti-IFN- $\gamma$   
636 (BD Biosciences).

637 Flow cytometry acquisition was performed using BD LSRFortessa X-20 (BD Biosciences) with  
638 FACSDiva Software version 8.0.1 (BD Biosciences). Analysis was performed using FlowJo  
639 software version 10 (Tree Star).

#### 640 **Evaluation of mitochondrial fitness using Mitotracker Green/Orange and Mitosox Red**

641 Single cell suspensions were stained with extracellular antibodies as described above and then with  
642 Mitotracker Green and Orange 150nM, or MitoSox Red 1 $\mu$ M (Invitrogen technologies) in PBS for  
643 30 min at room temperature and then washed with PBS. For experiments involving mitochondrial  
644 potential, dysregulated mitochondria were Mitotracker Green<sup>hi</sup> and Mitotracker Orange<sup>lo</sup>, while  
645 respiring mitochondria were considered as Mitotracker Green<sup>hi</sup> and Mitotracker Orange<sup>hi</sup> as  
646 previously described (85)

#### 647 **Extracellular Flux Analysis**

648 Real-time oxygen consumption rates (OCR) of purified splenic NK cells were measured in XF  
649 media (non-buffered DMEM containing 2mM L-glutamine, 25mM glucose and 1mM sodium  
650 pyruvate) using a Seahorse XFe 96 Analyzer (Agilent Technologies). For the mitochondrial stress  
651 test, mitochondrial inhibitors oligomycin, fluorocarbonyl cyanide phenylhydrazone (FCCP),  
652 antimycin A and rotenone were used, as per the manufacturer's recommendations. Briefly, NK  
653 cells were seeded at a density of 200 000 cells per well and 3 basal measurements were taken.  
654 Following this, 2 consecutive measurements were taken following each injection of oligomycin,  
655 FCCP, and antimycin A with rotenone. All measurements were normalized to cell number using a

656 crystal violet dye extraction assay. Oxygen consumption curves were generated using Wave  
657 Desktop 2.3 (Agilent Technologies). Basal OCR was calculated by subtracting measurement 7  
658 (non-mitochondrial respiration) from measurement 1. Maximal respiration was calculated by  
659 subtracting measurement 7 (non-mitochondrial respiration) from measurement 5 and spare  
660 respiratory capacity was the difference between maximal respiration and basal rate.

### 661 **Adoptive transfer model**

662 NK cells were purified from uninfected spleens of WT and *CypD*<sup>-/-</sup> mice using the EasySep Mouse  
663 NK Cell Isolation Kit (Stem Cell Technologies) according to the supplier's recommendations.  
664 Sorted cells were counted, washed (cold sterile PBS) and normalized to 1x10<sup>5</sup> cells/50μL of sterile  
665 PBS. Purity was verified by flow cytometry and purity was always over 85% NK cells prior to  
666 transfer. NK cells were then transferred into *IL22*<sup>-/-</sup> mice on day 5 post-infection (50 PFU) via the  
667 intratracheal route. 2 days later, BAL were harvested for lung damage assays and, lungs were  
668 harvested for viral load analysis or histology.

### 669 **IL-22 or IFN-γ treatment**

670 Recombinant murine IL-22 or IFN-γ was purchased from Peprotech. Mice were intranasally  
671 infected with 50 PFU of IAV. On day 5 post-infection, mice were given either PBS, IL-22 or IFN-  
672 γ (both 100ng/25μL) intranasally. Mice were sacrificed on day 7 post-infection, and the lungs were  
673 harvested and processed to determine the pulmonary viral load, or the BAL collected for damage  
674 assays. In some experiments, mice were infected with 90 PFU and IL-22 was delivered as stated  
675 and survival was monitored.

676

677 **Histopathological analysis**

678 Lungs were inflated with and fixed for 48 h in 10% formalin, then embedded in paraffin. Next,  
679 5  $\mu\text{m}$  sections were cut and stained with Haematoxylin and Eosin or Masson's Trichrome. Slides  
680 were scanned at a resolution of 20 $\times$  magnification and pictures were taken using a Leica Aperio  
681 slide scanner (Leica). Quantification of collagen-afflicted areas on Masson's Trichrome stained  
682 slides was performed using ImageJ software (National Institutes of Health) as previously described  
683 (86).

684 **Total bioactive IFN-I assay**

685 Secretion of total active IFN-I (both IFN- $\alpha$  and IFN- $\beta$ ) in cell culture supernatants was assessed  
686 using the B16-Blue IFN- $\alpha$ / $\beta$  reporter cell line for murine samples (from InvivoGen), according to  
687 the specifications of the manufacturer. B16 cells were maintained in RPMI supplemented with  
688 10% (v/v) FBS, 2 mM L-glutamine and 100 U ml<sup>-1</sup> penicillin/streptomycin.

689 **Cell death analysis**

690 Lactate dehydrogenase release in the BAL of IAV-infected mice was quantified using the CytoTox  
691 96 Non-Radioactive Cytotoxicity Assay (Promega), per the manufacturer's recommendations.  
692 Dead cell levels *in vivo* were assessed using PE-AnnexinV (BioLegend) and NucSpot Far-Red  
693 (Biotium), according to the manufacturer's instructions and unfixed cells were acquired  
694 immediately by flow cytometry.

695

696

697 **Wet-to-dry ratio**

698 Lungs were harvested from naïve or IAV-infected mice (50 PFU; day 7 post-infection), and blood  
699 clots were carefully removed. Then, the lungs were weighed (wet weight) and dried in an oven  
700 (56 °C, 2 d; dry weight), and the dry weight was measured. Data are presented as the ratio of wet  
701 weight to dry weight.

702 **RNA isolation and reverse transcription quantitative PCR (qPCR)**

703 RNA from purified NK cells was extracted using RNeasy Kit (Qiagen) according to the  
704 manufacturer's instructions. Some 500 ng of RNA were reverse transcribed using the ABM 5X  
705 RT MasterMix (Applied Biological Materials), as directed by the manufacturer. Complementary  
706 DNA was generated by qPCR using BrightGreen SYBR Green (Applied Biological Materials). Cq  
707 values obtained on a CFX96 PCR System (Bio-Rad) were analysed using  $2^{-\Delta Cq}$  formula  
708 normalizing target gene expression to *Gapdh*.

709 **Library preparation and RNA-sequencing**

710 Bulk RNA was collected from purified, splenic NK cells from 5 WT (1 control, 4 IAV-infected)  
711 and 5 *CypD*<sup>-/-</sup> mice (1 control, 4 IAV-infected). Sequencing libraries were constructed using the  
712 the Illumina TruSeq protocol. Libraries were sequenced on an Illumina NovaSeq (paired-end 100  
713 base pair) to an average depth of 42.6 million reads per sample. Adapter sequences and low-quality  
714 score bases were trimmed from reads using Trim Galore (v0.6.2, Cutadapt v2.2) (87) in paired-  
715 end mode (-q 20 --paired --phred33). Trimmed reads were pseudoaligned to the *Mus musculus*  
716 reference transcriptome (mm10.81, downloaded from Ensembl) using the quant function in kallisto  
717 (v0.43) (88) in paired-end mode (average of 24.7 million pseudoaligned reads per sample). Gene-



718 level expression estimates accounting for the average transcript length across samples were  
719 calculated using the R (v3.6.3) package tximport (v1.14.2) (89).

## 720 **Modeling the effect of the *CypD*<sup>-/-</sup> genotype on gene expression**

721 Expression data was filtered for protein-coding genes that were sufficiently expressed across all  
722 samples (median logCPM > 1), leaving 12,451 genes for downstream analysis. After removing  
723 non-coding and lowly-expressed genes, normalization factors to scale the raw library sizes were  
724 calculated using calcNormFactors in edgeR (v3.26.8) (90). The voomWithQualityWeights  
725 function in limma (v3.40.6) (91) was used to apply these size factors, estimate the mean-variance  
726 relationship, convert counts to logCPM values, and estimate sample-specific observational weights  
727 that take into account variation in sample quality.

728 The following nested linear model was used to identify genes for which expression levels  
729 are differentially-expressed between WT and *CypD*<sup>-/-</sup> mice within each condition:

$$730 \quad M_1: E(i,j) \sim \begin{cases} \beta_0(i) + \beta_{CypD}^{ctl}(i) \cdot CypD(j) + \beta_{M\_aligned}(i) \cdot M\_aligned(j) + \varepsilon^{ctl}(i,j) & \text{if Condition} = ctl \\ \beta_0(i) + \beta_{flu}(i) + \beta_{CypD}^{flu}(i) \cdot CypD(j) + \beta_{M\_aligned}(i) \cdot M\_aligned(j) + \varepsilon^{flu}(i,j) & \text{if Condition} = flu \end{cases}$$

731 Here,  $E(i,j)$  represents the expression estimate of gene  $i$  for individual  $j$ ,  $\beta_0(i)$  is the global  
732 intercept accounting for the expected expression of gene  $i$  in a control WT mouse,  $\beta_{CypD}^{ctl}(i)$  and  
733  $\beta_{CypD}^{flu}(i)$  indicate the effects of the *CypD*<sup>-/-</sup> genotype on gene  $i$  within each condition, and  $\beta_{flu}(i)$   
734 represents the intrinsic infection effect of IAV infection. Further,  $M\_aligned$  represents the mean-  
735 centered, scaled (mean = 0, standard deviation = 1) number of pseudoaligned reads per sample (in  
736 millions), with  $\beta_{M\_aligned}$  being the impact of read depth on expression. Finally,  $\varepsilon^{ctl}$  represents the  
737 residuals for each respective condition (*ctl* or *flu*) for each gene  $i$ , individual  $j$  pair. The model was  
738 fit using the lmFit and eBayes functions in limma, and the estimates of the genotype effect ( $\beta_{CypD}^{ctl}(i)$ )

739 and  $\beta_{CypD}^{flu}(i)$  were extracted across all genes, along with their corresponding p-values. These  
740 estimates represent the genotype-related (WT vs  $CypD^{-/-}$ ) differential expression effects within  
741 each condition. We controlled for false discovery rate (FDR) using an approach analogous to that  
742 of Storey and Tibshirani (92, 93), which derives the null distribution empirically. To obtain a null,  
743 we performed 10 permutations, where genotype label (WT or  $CypD^{-/-}$ ) was permuted within  
744 infection condition (control or IAV-infected). We considered genes significantly differentially-  
745 expressed between genotypes if they had a  $\beta_{CypD}^{ctl}$  or  $\beta_{CypD}^{flu}$   $|\logFC| > 0.5$  and an FDR  $< 0.10$ . Of  
746 note, all of our downstream analyses focused only on the  $CypD^{-/-}$  effect in the IAV-infected  
747 condition ( $\beta_{CypD}^{flu}$ ).

#### 748 **Gene set enrichment analyses**

749 Gene set enrichment analysis was performed using two independent methods, fgsea (94) and  
750 ClueGO (95), depending on the type of data being evaluated. The enrichment program  
751 specifications and the data in which they were used to assess enrichments are described below:

752 The R package fgsea (v1.10.1) was used to perform gene set enrichment analysis for the genotype  
753 effects using the H hallmark gene sets (96). Input t-statistics were obtained directly from the  
754 topTable function in limma. These t-statistics were then ranked and used to perform the enrichment  
755 tests with the following parameters: minSize = 15, maxSize = 500, nperm = 100000. Enrichments  
756 scores (ES) and Benjamini-Hochberg adjusted p-values output by fgsea were collected for each  
757 tested gene set.

758 Gene set enrichment analysis was also performed for our lists of differentially-expressed (DE)  
759 genes between the WT and  $CypD^{-/-}$  mice in the influenza-infected condition using the ClueGO

760 (v2.5.7) (Bindea et al., 2009) Cytoscape (v3.7.1) (97) module in functional analysis mode, where  
761 the target set of genes was either the list of genes showing higher expression in the WT or *CypD*<sup>-/-</sup>  
762 mice and the background set was the list of all genes tested. Specifically, we tested for the  
763 enrichment of GO terms related to biological processes (ontology source: GO\_BiologicalProcess-  
764 EBI-UniProt-GOA-ACAP-ARAP\_08.05.2020\_00h00) using the following parameters: visual  
765 style = Groups, default Network Specificity, no GO Term Fusion, min. GO Tree Interval level =  
766 3, max. GO Tree Interval level = 8, min. number of genes = 2, min. percentage of genes = 4.0,  
767 statistical test used = Enrichment (right-sided hypergeometric test), p-value correction =  
768 Benjamini-Hochberg. For the graphical representation of the enrichment analysis, ClueGO  
769 clustering functionality was used (kappa threshold score for considering or rejecting term-to-term  
770 links set to 0.4). Only pathways with an FDR < 0.01 are reported.

771 To test for an enrichment of WT or *CypD*<sup>-/-</sup> DE genes in the IAV-infected condition among genes  
772 known to be involved in tissue repair and wound healing (TiRe gene set, curated from Yanai et al.  
773 (Yanai et al., 2016), n = 220 retained in our dataset), we calculated the proportion in our WT or  
774 *CypD*<sup>-/-</sup> DE gene lists that also fall into the TiRe gene set and considered this our “observed  
775 proportion”. To obtain a null distribution, we performed 1,000 permutations where, for each  
776 iteration, we: i) sampled the same number of genes as DE genes in our set (146 for WT and 169  
777 for *CypD*<sup>-/-</sup>) from a list of all genes tested, and ii) calculated the proportion of these genes that are  
778 also in the TiRe gene set (our “null percentage”). P-values were computed by evaluating the  
779 number of permutations in which the null percentage was greater than or equal to the observed  
780 percentage divided by the number of total permutations (n = 1,000).

781

782 **ELISA**

783 IFN- $\beta$  levels in infected lungs and BAL were measured using a VeriKine Mouse IFN- $\beta$  ELISA kit  
784 (PBL Assay Science). IFN- $\gamma$  and IL-22 levels were assessed by ELISA (R&D Systems), as  
785 directed by the manufacturer.

786 **Statistical analysis**

787 Data are presented as means  $\pm$  s.e.m. Statistical analyses were performed using GraphPad Prism  
788 version 8.0.2 software (GraphPad). Statistical differences were determined using a two-sided log-  
789 rank test (survival studies), one-way analysis of variance (ANOVA) followed by Sidak's multiple  
790 comparisons test, two-way ANOVA followed by Dunnett's or Tukey's multiple comparisons test,  
791 or two-tailed Student's T-Test, as outlined in the Figure Legends. Significance is denoted by \*  
792  $p < 0.05$ , \*\*  $p < 0.01$ , \*\*\*  $p < 0.001$ , \*\*\*\*  $p < 0.0001$ .

793 **Ethics**

794 All experiments involving animals were approved by McGill University (permit number 2010-  
795 5860) in strict accordance with the guidelines set out by the Canadian Council on Animal Care.

796

797

798

799

800

801

802

803

804

805 **REFERENCES**

806

- 807 1. R. Medzhitov, D. S. Schneider, M. P. Soares, Disease tolerance as a defense strategy. *Science* **335**,  
808 936-941 (2012).
- 809 2. R. Martins *et al.*, Disease Tolerance as an Inherent Component of Immunity. *Annu Rev Immunol*  
810 **37**, 405-437 (2019).
- 811 3. D. S. Schneider, J. S. Ayres, Two ways to survive infection: what resistance and tolerance can teach  
812 us about treating infectious diseases. *Nature Reviews Immunology* **8**, 889-895 (2008).
- 813 4. I. Meunier, E. Kaufmann, J. Downey, M. Divangahi, Unravelling the networks dictating host  
814 resistance versus tolerance during pulmonary infections. *Cell Tissue Res* **367**, 525-536 (2017).
- 815 5. E. Bautista *et al.*, Clinical aspects of pandemic 2009 influenza A (H1N1) virus infection. *N Engl J*  
816 *Med* **362**, 1708-1719 (2010).
- 817 6. L. A. Perrone, J. K. Plowden, A. Garcia-Sastre, J. M. Katz, T. M. Tumpey, H5N1 and 1918 pandemic  
818 influenza virus infection results in early and excessive infiltration of macrophages and neutrophils  
819 in the lungs of mice. *PLoS Pathog* **4**, e1000115 (2008).
- 820 7. M. Brandes, F. Klauschen, S. Kuchen, R. N. Germain, A systems analysis identifies a feedforward  
821 inflammatory circuit leading to lethal influenza infection. *Cell* **154**, 197-212 (2013).
- 822 8. N. H. Leung, C. Xu, D. K. Ip, B. J. Cowling, Review Article: The Fraction of Influenza Virus Infections  
823 That Are Asymptomatic: A Systematic Review and Meta-analysis. *Epidemiology* **26**, 862-872  
824 (2015).
- 825 9. L. Zou *et al.*, SARS-CoV-2 Viral Load in Upper Respiratory Specimens of Infected Patients. *N Engl J*  
826 *Med* **382**, 1177-1179 (2020).
- 827 10. J. S. Ayres, Surviving COVID-19: A disease tolerance perspective. *Sci Adv* **6**, eabc1518 (2020).
- 828 11. T. Narasaraju *et al.*, Excessive neutrophils and neutrophil extracellular traps contribute to acute  
829 lung injury of influenza pneumonitis. *Am J Pathol* **179**, 199-210 (2011).
- 830 12. K. L. Lin, Y. Suzuki, H. Nakano, E. Ramsburg, M. D. Gunn, CCR2+ monocyte-derived dendritic cells  
831 and exudate macrophages produce influenza-induced pulmonary immune pathology and  
832 mortality. *J Immunol* **180**, 2562-2572 (2008).
- 833 13. J. R. Aldridge, Jr. *et al.*, TNF/iNOS-producing dendritic cells are the necessary evil of lethal influenza  
834 virus infection. *Proceedings of the National Academy of Sciences of the United States of America*  
835 **106**, 5306-5311 (2009).
- 836 14. S. Herold *et al.*, Lung epithelial apoptosis in influenza virus pneumonia: the role of macrophage-  
837 expressed TNF-related apoptosis-inducing ligand. *J Exp Med* **205**, 3065-3077 (2008).
- 838 15. T. C. Dawson, M. A. Beck, W. A. Kuziel, F. Henderson, N. Maeda, Contrasting effects of CCR5 and  
839 CCR2 deficiency in the pulmonary inflammatory response to influenza A virus. *Am J Pathol* **156**,  
840 1951-1959 (2000).
- 841 16. E. Pernet, J. Downey, D. C. Vinh, W. S. Powell, M. Divangahi, Leukotriene B4-type I interferon axis  
842 regulates macrophage-mediated disease tolerance to influenza infection. *Nat Microbiol* **4**, 1389-  
843 1400 (2019).
- 844 17. D. Talmi-Frank *et al.*, Extracellular Matrix Proteolysis by MT1-MMP Contributes to Influenza-  
845 Related Tissue Damage and Mortality. *Cell Host Microbe* **20**, 458-470 (2016).
- 846 18. L. E. Carlin, E. A. Hemann, Z. R. Zacharias, J. W. Heusel, K. L. Legge, Natural Killer Cell Recruitment  
847 to the Lung During Influenza A Virus Infection Is Dependent on CXCR3, CCR5, and Virus Exposure  
848 Dose. *Frontiers in Immunology* **9**, (2018).
- 849 19. E. Vivier, E. Tomasello, M. Baratin, T. Walzer, S. Ugolini, Functions of natural killer cells. *Nat*  
850 *Immunol* **9**, 503-510 (2008).

- 851 20. A. Glasner *et al.*, Elucidating the mechanisms of influenza virus recognition by Ncr1. *PLoS One* **7**,  
852 e36837 (2012).
- 853 21. O. Mandelboim *et al.*, Recognition of haemagglutinins on virus-infected cells by NKp46 activates  
854 lysis by human NK cells. *Nature* **409**, 1055-1060 (2001).
- 855 22. T. Li *et al.*, Respiratory Influenza Virus Infection Induces Memory-like Liver NK Cells in Mice. *J*  
856 *Immunol* **198**, 1242-1252 (2017).
- 857 23. R. Gazit *et al.*, Lethal influenza infection in the absence of the natural killer cell receptor gene  
858 Ncr1. *Nature Immunology* **7**, 517-523 (2006).
- 859 24. J. Stein-Streilein, J. Guffee, In vivo treatment of mice and hamsters with antibodies to asialo GM1  
860 increases morbidity and mortality to pulmonary influenza infection. *J Immunol* **136**, 1435-1441  
861 (1986).
- 862 25. J. P. McAleer, J. K. Kolls, Directing traffic: IL-17 and IL-22 coordinate pulmonary immune defense.  
863 *Immunol Rev* **260**, 129-144 (2014).
- 864 26. S. Ivanov *et al.*, Interleukin-22 Reduces Lung Inflammation during Influenza A Virus Infection and  
865 Protects against Secondary Bacterial Infection. *Journal of virology* **87**, 6911-6924 (2013).
- 866 27. C. Paget *et al.*, Interleukin-22 Is Produced by Invariant Natural Killer T Lymphocytes during  
867 Influenza A Virus Infection POTENTIAL ROLE IN PROTECTION AGAINST LUNG EPITHELIAL  
868 DAMAGES. *Journal of Biological Chemistry* **287**, 8816-8829 (2012).
- 869 28. H. L. Guo, D. J. Topham, Interleukin-22 (IL-22) Production by Pulmonary Natural Killer Cells and  
870 the Potential Role of IL-22 during Primary Influenza Virus Infection. *Journal of virology* **84**, 7750-  
871 7759 (2010).
- 872 29. P. Kumar, M. S. Thakar, W. Ouyang, S. Malarkannan, IL-22 from conventional NK cells is epithelial  
873 regenerative and inflammation protective during influenza infection. *Mucosal Immunology* **6**, 69-  
874 82 (2013).
- 875 30. D. A. Pociask *et al.*, IL-22 Is Essential for Lung Epithelial Repair following Influenza Infection.  
876 *American Journal of Pathology* **182**, 1286-1296 (2013).
- 877 31. C. P. Baines *et al.*, Loss of cyclophilin D reveals a critical role for mitochondrial permeability  
878 transition in cell death. *Nature* **434**, 658-662 (2005).
- 879 32. T. Nakagawa *et al.*, Cyclophilin D-dependent mitochondrial permeability transition regulates some  
880 necrotic but not apoptotic cell death. *Nature* **434**, 652-658 (2005).
- 881 33. X. Zhao *et al.*, Bcl-xL mediates RIPK3-dependent necrosis in M. tuberculosis-infected  
882 macrophages. *Mucosal Immunol* **10**, 1553-1568 (2017).
- 883 34. J. Downey, E. Pernet, F. Coulombe, M. Divangahi, Dissecting host cell death programs in the  
884 pathogenesis of influenza. *Microbes Infect* **20**, 560-569 (2018).
- 885 35. J. Jaworska *et al.*, NLRX1 prevents mitochondrial induced apoptosis and enhances macrophage  
886 antiviral immunity by interacting with influenza virus PB1-F2 protein. *Proceedings of the National*  
887 *Academy of Sciences of the United States of America* **111**, E2110-2119 (2014).
- 888 36. H. E. Ghoneim, P. G. Thomas, J. A. McCullers, Depletion of alveolar macrophages during influenza  
889 infection facilitates bacterial superinfections. *J Immunol* **191**, 1250-1259 (2013).
- 890 37. L. Chiossone *et al.*, Maturation of mouse NK cells is a 4-stage developmental program. *Blood* **113**,  
891 5488-5496 (2009).
- 892 38. K. L. O'Brien, D. K. Finlay, Immunometabolism and natural killer cell responses. *Nat Rev Immunol*  
893 **19**, 282-290 (2019).
- 894 39. M. P. Soares, L. Teixeira, L. F. Moita, Disease tolerance and immunity in host protection against  
895 infection. *Nat Rev Immunol* **17**, 83-96 (2017).
- 896 40. S. Sengupta *et al.*, Circadian control of lung inflammation in influenza infection. *Nat Commun* **10**,  
897 4107 (2019).

- 898 41. R. Collin *et al.*, An Unbiased Linkage Approach Reveals That the p53 Pathway Is Coupled to NK Cell  
899 Maturation. *J Immunol* **199**, 1490-1504 (2017).
- 900 42. B. Fu *et al.*, CD11b and CD27 reflect distinct population and functional specialization in human  
901 natural killer cells. *Immunology* **133**, 350-359 (2011).
- 902 43. A. Crinier *et al.*, High-Dimensional Single-Cell Analysis Identifies Organ-Specific Signatures and  
903 Conserved NK Cell Subsets in Humans and Mice. *Immunity* **49**, 971-986 e975 (2018).
- 904 44. E. L. Gautier *et al.*, Gene-expression profiles and transcriptional regulatory pathways that underlie  
905 the identity and diversity of mouse tissue macrophages. *Nat Immunol* **13**, 1118-1128 (2012).
- 906 45. A. Liberzon *et al.*, The Molecular Signatures Database (MSigDB) hallmark gene set collection. *Cell*  
907 *Syst* **1**, 417-425 (2015).
- 908 46. T. Zhang *et al.*, Fibronectin maintains survival of mouse natural killer (NK) cells via  
909 CD11b/Src/beta-catenin pathway. *Blood* **114**, 4081-4088 (2009).
- 910 47. A. Marçais *et al.*, The metabolic checkpoint kinase mTOR is essential for IL-15 signaling during the  
911 development and activation of NK cells. *Nat Immunol* **15**, 749-757 (2014).
- 912 48. C. Yang *et al.*, mTORC1 and mTORC2 differentially promote natural killer cell development. *Elife*  
913 **7**, (2018).
- 914 49. G. A. Porter, Jr., G. Beutner, Cyclophilin D, Somehow a Master Regulator of Mitochondrial  
915 Function. *Biomolecules* **8**, (2018).
- 916 50. M. P. Longhi, A. Williams, M. Wise, B. P. Morgan, A. Gallimore, CD59a deficiency exacerbates  
917 influenza-induced lung inflammation through complement-dependent and -independent  
918 mechanisms. *European journal of immunology* **37**, 1266-1274 (2007).
- 919 51. M. J. van Helden, D. M. Zaiss, A. J. Sijts, CCR2 defines a distinct population of NK cells and mediates  
920 their migration during influenza virus infection in mice. *PLoS One* **7**, e52027 (2012).
- 921 52. H. Peng *et al.*, Liver-resident NK cells confer adaptive immunity in skin-contact inflammation. *The*  
922 *Journal of Clinical Investigation* **123**, 1444-1456 (2013).
- 923 53. D. K. Sojka *et al.*, Tissue-resident natural killer (NK) cells are cell lineages distinct from thymic and  
924 conventional splenic NK cells. *Elife* **3**, e01659 (2014).
- 925 54. A. M. Abel, C. Yang, M. S. Thakar, S. Malarkannan, Natural Killer Cells: Development, Maturation,  
926 and Clinical Utilization. *Frontiers in Immunology* **9**, (2018).
- 927 55. J. N. P. Smith *et al.*, Type I IFNs drive hematopoietic stem and progenitor cell collapse via impaired  
928 proliferation and increased RIPK1-dependent cell death during shock-like ehrlichial infection. *PLoS*  
929 *Pathog* **14**, e1007234 (2018).
- 930 56. M. Yamashita, E. Passegue, TNF-alpha Coordinates Hematopoietic Stem Cell Survival and Myeloid  
931 Regeneration. *Cell Stem Cell* **25**, 357-372 e357 (2019).
- 932 57. C. A. Brady, L. D. Attardi, p53 at a glance. *J Cell Sci* **123**, 2527-2532 (2010).
- 933 58. A. V. Vaseva *et al.*, p53 opens the mitochondrial permeability transition pore to trigger necrosis.  
934 *Cell* **149**, 1536-1548 (2012).
- 935 59. A. Bigi *et al.*, Cyclophilin D counteracts P53-mediated growth arrest and promotes Ras  
936 tumorigenesis. *Oncogene* **35**, 5132-5143 (2016).
- 937 60. J. I. Belle *et al.*, p53 mediates loss of hematopoietic stem cell function and lymphopenia in Mym1  
938 deficiency. *Blood* **125**, 2344-2348 (2015).
- 939 61. S. M. Mendrysa *et al.*, mdm2 Is critical for inhibition of p53 during lymphopoiesis and the response  
940 to ionizing irradiation. *Mol Cell Biol* **23**, 462-472 (2003).
- 941 62. S. Stegemann-Koniszewski *et al.*, Respiratory Influenza A Virus Infection Triggers Local and  
942 Systemic Natural Killer Cell Activation via Toll-Like Receptor 7. *Front Immunol* **9**, 245 (2018).
- 943 63. B. R. Long *et al.*, Elevated Frequency of Gamma Interferon-Producing NK Cells in Healthy Adults  
944 Vaccinated against Influenza Virus. *Clinical and Vaccine Immunology* **15**, 120-130 (2008).

- 945 64. I. D. Weiss *et al.*, IFN-gamma Treatment at Early Stages of Influenza Virus Infection Protects Mice  
946 from Death in a NK Cell-Dependent Manner. *J Interf Cytok Res* **30**, 439-449 (2010).
- 947 65. D. Califano *et al.*, IFN-gamma increases susceptibility to influenza A infection through suppression  
948 of group II innate lymphoid cells. *Mucosal Immunology* **11**, 209-219 (2018).
- 949 66. M. B. Graham *et al.*, Response to influenza infection in mice with a targeted disruption in the  
950 interferon gamma gene. *J Exp Med* **178**, 1725-1732 (1993).
- 951 67. A. Iwasaki, E. F. Foxman, R. D. Molony, Early local immune defences in the respiratory tract. *Nat*  
952 *Rev Immunol* **17**, 7-20 (2017).
- 953 68. F. Krammer *et al.*, Influenza. *Nat Rev Dis Primers* **4**, 3 (2018).
- 954 69. P. X. Kover, B. A. Schaal, Genetic variation for disease resistance and tolerance among *Arabidopsis*  
955 *thaliana* accessions. *Proceedings of the National Academy of Sciences of the United States of*  
956 *America* **99**, 11270-11274 (2002).
- 957 70. M. Divangahi, Are tolerance and training required to end TB? *Nat Rev Immunol* **18**, 661-663  
958 (2018).
- 959 71. I. L. King, Y. Li, Host-Parasite Interactions Promote Disease Tolerance to Intestinal Helminth  
960 Infection. *Frontiers in Immunology* **9**, (2018).
- 961 72. F. Tzelepis *et al.*, Mitochondrial cyclophilin D regulates T cell metabolic responses and disease  
962 tolerance to tuberculosis. *Sci Immunol* **3**, (2018).
- 963 73. S. A. Condotta *et al.*, Cyclophilin D Regulates Antiviral CD8(+) T Cell Survival in a Cell-Extrinsic  
964 Manner. *Immunohorizons* **4**, 217-230 (2020).
- 965 74. S. M. Fayaz, Y. V. Raj, R. G. Krishnamurthy, CypD: The Key to the Death Door. *CNS Neurol Disord*  
966 *Drug Targets* **14**, 654-663 (2015).
- 967 75. M. Forte *et al.*, Cyclophilin D inactivation protects axons in experimental autoimmune  
968 encephalomyelitis, an animal model of multiple sclerosis. *Proceedings of the National Academy*  
969 *of Sciences of the United States of America* **104**, 7558-7563 (2007).
- 970 76. A. P. West, G. S. Shadel, S. Ghosh, Mitochondria in innate immune responses. *Nat Rev Immunol*  
971 **11**, 389-402 (2011).
- 972 77. D. Wu *et al.*, Type 1 Interferons Induce Changes in Core Metabolism that Are Critical for Immune  
973 Function. *Immunity* **44**, 1325-1336 (2016).
- 974 78. M. Kanayama *et al.*, Skewing of the population balance of lymphoid and myeloid cells by secreted  
975 and intracellular osteopontin. *Nat Immunol* **18**, 973-984 (2017).
- 976 79. N. Khan *et al.*, M. tuberculosis Reprograms Hematopoietic Stem Cells to Limit Myelopoiesis and  
977 Impair Trained Immunity. *Cell* **183**, 752-770.e722 (2020).
- 978 80. M. G. Netea *et al.*, Defining trained immunity and its role in health and disease. *Nat Rev Immunol*,  
979 (2020).
- 980 81. E. Kaufmann *et al.*, BCG Educates Hematopoietic Stem Cells to Generate Protective Innate  
981 Immunity against Tuberculosis. *Cell* **172**, 176-190 e119 (2018).
- 982 82. J. Kleinnijenhuis *et al.*, BCG-induced trained immunity in NK cells: Role for non-specific protection  
983 to infection. *Clin Immunol* **155**, 213-219 (2014).
- 984 83. F. Coulombe *et al.*, Targeted prostaglandin E2 inhibition enhances antiviral immunity through  
985 induction of type I interferon and apoptosis in macrophages. *Immunity* **40**, 554-568 (2014).
- 986 84. M. Z. Tay, C. M. Poh, L. Renia, P. A. MacAry, L. F. P. Ng, The trinity of COVID-19: immunity,  
987 inflammation and intervention. *Nat Rev Immunol* **20**, 363-374 (2020).
- 988 85. W. K. E. Ip, N. Hoshi, D. S. Shouval, S. Snapper, R. Medzhitov, Anti-inflammatory effect of IL-10  
989 mediated by metabolic reprogramming of macrophages. *Science* **356**, 513-519 (2017).
- 990 86. J. Schipke *et al.*, Assessment of cardiac fibrosis: a morphometric method comparison for collagen  
991 quantification. *J Appl Physiol* **122**, 1019-1030 (2017).



- 992 87. M. Martin, Cutadapt removes adapter sequences from high-throughput sequencing reads. *2011*  
993 **17**, 3 (2011).
- 994 88. N. L. Bray, H. Pimentel, P. Melsted, L. Pachter, Near-optimal probabilistic RNA-seq quantification.  
995 *Nat Biotechnol* **34**, 525-527 (2016).
- 996 89. C. Sonesson, M. I. Love, M. D. Robinson, Differential analyses for RNA-seq: transcript-level  
997 estimates improve gene-level inferences. *F1000Res* **4**, 1521 (2015).
- 998 90. M. D. Robinson, D. J. McCarthy, G. K. Smyth, edgeR: a Bioconductor package for differential  
999 expression analysis of digital gene expression data. *Bioinformatics* **26**, 139-140 (2010).
- 1000 91. M. E. Ritchie *et al.*, limma powers differential expression analyses for RNA-sequencing and  
1001 microarray studies. *Nucleic Acids Res* **43**, e47 (2015).
- 1002 92. J. D. Storey, R. Tibshirani, Statistical significance for genomewide studies. *Proceedings of the*  
1003 *National Academy of Sciences of the United States of America* **100**, 9440-9445 (2003).
- 1004 93. Y. Nedelec *et al.*, Genetic Ancestry and Natural Selection Drive Population Differences in Immune  
1005 Responses to Pathogens. *Cell* **167**, 657-669 e621 (2016).
- 1006 94. G. Korotkevich, V. Sukhov, A. Sergushichev, Fast gene set enrichment analysis. *bioRxiv*, 060012  
1007 (2019).
- 1008 95. G. Bindea *et al.*, ClueGO: a Cytoscape plug-in to decipher functionally grouped gene ontology and  
1009 pathway annotation networks. *Bioinformatics* **25**, 1091-1093 (2009).
- 1010 96. A. Subramanian *et al.*, Gene set enrichment analysis: a knowledge-based approach for  
1011 interpreting genome-wide expression profiles. *Proceedings of the National Academy of Sciences*  
1012 *of the United States of America* **102**, 15545-15550 (2005).
- 1013 97. P. Shannon *et al.*, Cytoscape: a software environment for integrated models of biomolecular  
1014 interaction networks. *Genome Res* **13**, 2498-2504 (2003).
- 1015 98. H. Yanai *et al.*, Tissue repair genes: the TiRe database and its implication for skin wound healing.  
1016 *Oncotarget* **7**, 21145-21155 (2016).

1017

1018

1019 **AUTHOR CONTRIBUTIONS**

1020 M.D. conceived and supervised the project. J.D. and M.D. designed the experiments; J.D., E.P.  
1021 and K.A.T performed experiments. Data were analyzed and interpreted by J.D. and M.D, except  
1022 for RNA-seq data which were all analyzed and interpreted by H.E.R, under the supervision of  
1023 L.B.B.. I.L.K. and S.A.K provided technical input/reagents, expertise and critically reviewed the  
1024 manuscript. J.D., H.E.R., L.B.B and M.D. wrote the manuscript.

1025

1026 **DECLARATION OF INTEREST**

1027 The authors declare there are no competing interests.

1028

1029 **DATA AND MATERIALS AVAILABILITY**

1030 All raw data generated for this paper are available at GEO GSE163290, and processed data files  
1031 are accessible on Zenodo (doi: 10.5281/zenodo.4300712). All code used for analysis, along with  
1032 associated documentation, is available at [https://github.com/herandolph/CypD\\_flu](https://github.com/herandolph/CypD_flu).

1033

1034 **ACKNOWLEDGEMENTS**

1035 The authors would like to thank members of the Small Animal Imaging Labs (SAIL) of the RI-  
1036 MUHC for assistance with the experiments in Fig. 1I, particularly Dr. Barry Bedell and Mathieu  
1037 Simard. Additionally, the authors thank the Histopathology Core of the RI-MUHC for assistance  
1038 with histology experiments, as well members of the Institut de recherches cliniques de Montréal  
1039 (IRCM) for the generation and sequencing of RNA-seq libraries. Models in Fig. 6A, 7E and 7J  
1040 were created by BioRender.com. This work was supported by the Canadian Institute of Health  
1041 Research (CIHR) Project Grant (168885) to M.D.. M.D. holds a Fonds de recherche du Québec–

1042 Santé (FRQS) Award and the Strauss Chair in Respiratory Diseases. J.D. was supported by the  
1043 Molson Foundation Award and RI-MUHC Studentship, H.E.R. was supported by a National  
1044 Science Foundation Graduate Research Fellowship (DGE-1746045), E.P. was supported by a  
1045 Fonds de Recherche du Québec–Santé Fellowship. The funders had no role in study design, data  
1046 collection and analysis, decision to publish, or preparation of the manuscript.  
1047

1048 **FIGURE LEGENDS**

1049 **Figure 1: CypD protects against IAV infection by promoting disease tolerance.** (A-B) WT  
1050 and *CypD*<sup>-/-</sup> mice were infected with the LD<sub>50</sub> dose of 90 PFU and survival (A) and weight loss  
1051 (B) were monitored. (C-N) WT and *CypD*<sup>-/-</sup> mice were infected with a sublethal dose of 50 PFU.  
1052 At various time points post-infection viral load (C), total active IFN-I in the lungs (D) or BAL (E)  
1053 were measured. (F) Lung wet-to-dry ratio at steady-state or at day 7 post-infection. Protein (G) or  
1054 erythrocytes (H) in the BAL of mice at various timepoints post-infection. (I) Fluorescence intensity  
1055 of lungs following one hour of Texas-Red Dextran administration. The left panels are  
1056 representative lung images from two separate experiments and are quantified on the right. Total  
1057 cell counts in the lungs (J) and BAL (K) following infection. Representative micrographs of lungs  
1058 stained with hematoxylin and eosin (L; scale bar = 30 μM) or Masson's Trichrome (M; scale bar  
1059 = 20μM) that are either uninfected or infected for 7 days, as quantified in (N). In A and B, total  
1060 mice are denoted in the figures, in C-K each symbol represents a unique mouse, in L and M  
1061 micrographs are representative of at least 5 mice and in N each symbol represents the  
1062 quantification of one random micrograph (n=10 micrographs total). All figures are a compilation  
1063 of at least two experiments. Statistical analyses were performed using the Log Rank Test (A),  
1064 Two-way ANOVA followed by Sidak's multiple comparison test (B-H, J-K, N) or Two-tailed  
1065 Student's T-Test (I). See also **Figure S1**.

1066  
1067 **Figure 2: CypD mediates disease tolerance via hematopoietic cells and mice exhibit altered**  
1068 **NK cell responses upon infection.** (A-J) Mice were infected with 50 PFU of IAV. (A-D) Chimeric  
1069 mice were generated by reconstituting irradiated *CypD*-deficient mice (CD45.2) with WT CD45.1  
1070 bone marrow (WT → *CypD*<sup>-/-</sup>) or irradiated CD45.1 mice with *CypD*-deficient (CD45.2) bone

1071 marrow (*CypD*<sup>-/-</sup> → WT). Chimeric mice were infected for 7 days and total erythrocytes in the  
1072 BAL (A) were quantified. Representative micrographs of hematoxylin and eosin-stained lungs (B;  
1073 scale bar = 30 μM) or Masson's Trichrome (C; scale bar = 30 μM) as quantified in (D). (E-G)  
1074 BAL from WT and *CypD*<sup>-/-</sup> mice were phenotyped by flow cytometry and total frequencies (left  
1075 panels) and total cell counts (right panels) of IMM (E), neutrophils (F) and NK cells (G)  
1076 enumerated. Mean fluorescence intensities of perforin and granzyme B of NK cells at day 7 (H)  
1077 post-IAV infection. (I) Representative FACS plot of CD27 and CD11b expression on NK cells in  
1078 the BAL of WT versus *CypD*-deficient mice at 7 days post-infection. (J) Quantifications of the  
1079 percentages (left panel) and total cells counts (right panel) of NK cell activation subsets in the  
1080 BAL at day 7 post-infection. In each panel, each symbol indicates a separate mouse, except in B-  
1081 C, which is a representative figure of 4 mice/group, D, where each symbol is a randomly quantified  
1082 micrograph (n=10 micrographs) and I, which is a representative plot compiled in J. All figures are  
1083 a compilation of at least two experiments, except for H, which is one representative experiment of  
1084 two. Statistical analyses were performed using the One-way ANOVA followed by Tukey's  
1085 multiple comparisons (A, D), Two-way ANOVA followed by Sidak's multiple comparison test  
1086 (E-G, J) or Two-tailed Student's T-Test (H). See also **Figure S2**.

1087  
1088 **Figure 3: *CypD*<sup>-/-</sup> alters the transcriptome of IAV-infected splenic NK cells and induces a**  
1089 **distinct metabolic phenotype.** (A) Volcano plot of genes significantly differentially expressed  
1090 (DE) between IAV-infected splenic NK cells of WT (blue, log<sub>2</sub> fold change (FC) < -0.5, FDR <  
1091 0.10) and *CypD*<sup>-/-</sup> (green, log<sub>2</sub> FC > 0.5, FDR < 0.10) mice. Genes with a negative log<sub>2</sub> FC show  
1092 higher expression in WT mice, while genes with a positive log<sub>2</sub> FC show higher expression in  
1093 *CypD*<sup>-/-</sup> mice. Selected genes show the most extreme changes in expression between the two

1094 genotype groups. (B) Significant (FDR < 0.01) ClueGO pathway enrichments for genes showing  
1095 higher expression (FDR < 0.10) in the WT mice versus (C) *CypD*<sup>-/-</sup> mice in IAV-infected splenic  
1096 NK cells. (D) Heatmap showing expression levels (mean-centered and scaled) for a subset of  
1097 maturity marker genes as identified in Chiossone et al. (37) in IAV-infected NK cells of WT and  
1098 *CypD*<sup>-/-</sup> mice. (“imm” = immature NK [CD27+CD11b-], “int” = intermediate-mature NK  
1099 [CD27+CD11b+], “mature” = mature NK [CD27-CD11b+]). (E) Barcode enrichment plots for the  
1100 hallmark Wnt/β-catenin signaling, (F) mTORC1 signaling and (G) oxidative phosphorylation  
1101 pathways. A positive enrichment score (ES) corresponds to pathway enrichment among genes  
1102 more highly expressed in *CypD*<sup>-/-</sup> mice (green), while a negative ES corresponds to pathway  
1103 enrichment among genes more highly expressed in WT mice (blue). (H) Average, scaled logCPM  
1104 expression estimates across genes in the hallmark Wnt/β-catenin signaling pathway. Oxygen  
1105 consumption on purified splenic NK cells at day 3 (I-L) or day 5 (M-P) post-infection. (I, M)  
1106 Representative Seahorse curves from which the values in (J-L) and (N-P) were calculated,  
1107 respectively. (Q) Representative flow cytometry plots of splenic NK cells differentially stained for  
1108 Mitotracker Orange and Mitotracker Green, as quantified in (R-S). Healthy respiring mitochondria  
1109 were considered as Orange<sup>hi</sup> and Green<sup>hi</sup> (R) and disrupted mitochondria were considered as  
1110 Orange<sup>lo</sup> and Green<sup>hi</sup> (S). (T) Frequency of MitoSox Red<sup>hi</sup> NK cells in the spleen. (I-P) All data  
1111 are from one representative experiment of two independent experiments and each dot is indicative  
1112 of a technical replicate of NK cells compiled from 5 different mice. (Q-T) Data are compiled from  
1113 two independent experiments and each dot represents a unique mouse. Statistical differences were  
1114 assessed by Student’s T-Test (J-L and N-P) or Two-way ANOVA followed by Sidak’s multiple  
1115 comparisons test (R-T). See also **Figure S3**.

1116

1117  
1118 **Figure 4: Splenic NK cells of *CypD*<sup>-/-</sup> mice are functionally reprogrammed.** (A) Heatmap  
1119 showing expression levels (mean-centered and scaled) for selected subsets of genes that fall into  
1120 ontology pathways and functional gene sets significantly enriched among WT or (B) *CypD*<sup>-/-</sup> gene  
1121 sets in IAV-infected splenic NK cells. (C) Proportion of WT or *CypD*<sup>-/-</sup> differentially-expressed  
1122 genes that are in the tissue repair (TiRe) dataset (98) (WT, blue dashed line, p = 0.009; *CypD*<sup>-/-</sup>,  
1123 green dashed line, p = 0.798) compared to random expectation when sampling the same total  
1124 number of WT or *CypD*<sup>-/-</sup> differentially-expressed genes 1,000 times from all genes tested (null,  
1125 density distributions).

1126  
1127 **Figure 5: *CypD*-deficient mice have impaired recruitment of activated NK cells from the**  
1128 **peripheral blood.** (A-G) WT and *CypD*<sup>-/-</sup> were infected with 50 PFU. (A) Intracellular expression  
1129 of Ki67, indicative of proliferative cells, in NK cells of the BAL. Left panels show a representative  
1130 FACS plot as quantified on the right at day 5 post-infection. (B) Intracellular expression of active  
1131 Caspase 3 expression by flow cytometry, indicative of apoptotic NK cells in the BAL of infected  
1132 mice. The panels on the left are of a representative FACS plot at day 5 post-infection, as quantified  
1133 on the right. (C) CCR2 expression on NK cells of the BAL with a day 5 representative FACS plot  
1134 on the left and quantified on the right. (D) Differential expression of CD49b versus CD49a on NK  
1135 cells of the BAL with a representative FACS plot on the left. (E-F) At various times post-infection  
1136 peripheral blood was collected and the frequency of NK cells (E) and their activation state as  
1137 defined by CD27 and CD11b expression (F-G) were quantified. In the left panel of F is a  
1138 representative FACS plot of NK cells at day 5 post-infection. Each panel represents the  
1139 compilation of at least two experiments, except C which is one representative experiment of two

1140 independent experiments. Each symbol represents one unique mouse. For all panels, Two-way  
1141 ANOVA followed by Sidak's multiple comparisons test was performed to determine significance.  
1142 See also **Figure S4**.

1143  
1144 **Figure 6: *CypD*<sup>-/-</sup> mice have reduced NK cell hematopoiesis in the bone marrow of infected**  
1145 **mice due to cell death of progenitors.** (A) Schematic of NK cell hematopoiesis starting at  
1146 pluripotent LKS cells down to NK cells. (B-G) Total cell counts of LKS (B), CLP (C), pre-NKP  
1147 (D-E), NKP (D, F) and differential activation statuses of mature NK cells (G) as assessed by flow  
1148 cytometry. (D) Representative FACS plots of pre-NKP and NKP populations in the bone marrow  
1149 at 5 days post-infection. In B, C and G, left panels are representative FACS plots taken at day 3  
1150 (B-C) and day 5 (G) post-infection. (H-I) Expression of p53 within pre-NKP (H) and NKP (I)  
1151 populations in the bone marrow. Left panels are representative histograms taken at 5 days post-  
1152 infection as quantified in the right panels. (J) Differential expression of AnnexinV and NucSpot to  
1153 determine the levels of dead cells within the NKP population at various times post-infection. FACS  
1154 plots on the left are taken from day 5 post-IAV infection. Panels in B-F and I-J are a compilation  
1155 of at least 2 experiments, while G-H are one representative experiment of three independent  
1156 experiments, with each symbol representing an individual mouse. In all panels, significance was  
1157 assessed by Two-way ANOVA followed by Sidak's multiple comparisons test. See also **Figure**  
1158 **S4**.

1159  
1160 **Figure 7: Reduced IL-22 production by NK cells in the airways is responsible for the**  
1161 **susceptibility of *CypD*<sup>-/-</sup> mice.** (A) Levels of IFN- $\gamma$  in the BAL of infected WT and *CypD*<sup>-/-</sup> mice  
1162 as determined by ELISA. (B) Intracellular cytokine staining of IFN- $\gamma$  in NK cells. FACS plots are



1163 representative of the quantification on the right and are gated against the FMO. (C) Levels of IL-  
1164 22 in the BAL of infected WT and *CypD*<sup>-/-</sup> mice as determined by ELISA. (D) Intracellular  
1165 cytokine staining for IL-22 by NK cells in the BAL. FACS plots on the left are representative of  
1166 the quantification on the right. An IL-22-deficient mouse was used as a staining control for  
1167 specificity. (E) Model of recombinant IL-22 experiments as used in F-I. (F) Mice were infected  
1168 with LD<sub>50</sub> 90 PFU, administered recombinant IL-22 or PBS on day 5 p.i. and survival monitored.  
1169 (G-I) a sublethal dosage of 50 PFU was used and mice were administered IL-22 or PBS as before.  
1170 At day 7, viral loads were quantified (G), pulmonary inflammation and fibrosis were assessed by  
1171 hematoxylin and eosin or Masson's Trichrome staining, respectively (H; scale bar = 30μM) or  
1172 erythrocytes in the BAL were enumerated (I). (J) Schematic of NK cell transfer experiments  
1173 performed in K-N. On day 7 post-infection, day 2 post-transfer, protein (L), erythrocyte (M) and  
1174 leukocyte levels in the BAL or lung viral loads (N) were assessed. In panels A, C, F, I, K, L and  
1175 N data are combinations of two or three independent experiments. In B, D, G and M data are from  
1176 one experiment that is representative of two or three independent experiments. Micrographs in H  
1177 are representative of 3 or 4 individual mice. In A-D, G, I and K-N, each symbol represents data  
1178 from one individual mouse, while in H total n values are displayed in the panel legend. Statistical  
1179 analyses were performed as follows: in A-D Two-way ANOVA followed by Sidak's multiple  
1180 comparisons test; F Log Rank Test; G, I Two-way ANOVA followed by Tukey's multiple  
1181 comparisons test; K-N One-way ANOVA followed by Dunnett's multiple comparisons test,  
1182 Kruskal-Wallis test. See also **Figure S5**.

1183

1184

1185

1186 **SUPPLEMENTARY FIGURE LEGENDS:**

1187 **Supplementary Figure 1: Susceptibility of CypD-deficient is due to disease tolerance and not**  
1188 **host resistance mechanisms.** (A-D) Mice were infected with 50 PFU of IAV and levels of LDH  
1189 in the BAL (A), IFN- $\beta$  in the lung (B) or BAL (C) were quantified. (D) Representative pictures of  
1190 the BAL of mice over the course of infection as quantified in **Figure 1H**. Gating strategy for WT  
1191 (E) and *CypD*<sup>-/-</sup> (F) mice used to quantify innate cells in the study. In panels A-C, each symbol  
1192 indicates a separate mouse. Panel A is a compilation of two independent experiments and B-C are  
1193 from one experiment. In panels A-C differences were assessed by Two-way ANOVA followed by  
1194 Sidak's multiple comparisons test. Refers to **Figures 1-2**

1195  
1196 **Supplementary Figure 2: Kinetics and activation of NK cells.** (A) Representative flow  
1197 cytometry plots validating reconstitution of chimeric mice. (B-H) Mice were infected with 50 PFU  
1198 of IAV. (B) Total cell counts in the BAL of chimeric mice at 7 days post-infection. (C-E)  
1199 Frequencies (left panels) and total cell counts (right panels) of (IMM) (C), neutrophils (D) and NK  
1200 cells (E) in the lung. (F) Representative FACS plots of NK cell activation in the lung at day 7 and  
1201 quantified in (G) with frequencies in the left panel and total cell counts in the right. (H) Frequencies  
1202 (left panels) and total cell counts (right panels) of NK cell activation in the spleen at day 5 post-  
1203 IAV infection. In each panel, each symbol represents an individual mouse. Each panel is a  
1204 compilation of two individual experiments, except H which is one representative experiment of  
1205 two. Statistical differences were determined by One-way ANOVA followed by Dunnett's test in  
1206 B, or Two-way ANOVA followed by Sidak's multiple comparisons test in all other panels. Refers  
1207 to **Figure 2**.

1208

1209 **Supplementary Figure 3. RNA-sequencing of purified, splenic NK cells in control and IAV-**  
1210 **infected conditions.** (A) Expression of *CypD* in purified NK cells by qPCR. (B) PCA  
1211 decomposition of the splenic NK cell expression data in WT (blue) and *CypD*<sup>-/-</sup> (green) mice in  
1212 control and IAV-infected conditions. PC1 (percent variance explained = 56.3%) separates samples  
1213 by infection status. (C) Barcode enrichment plots for maturity marker gene sets as defined in  
1214 Chiossone et al. 2009. A negative enrichment score (ES) corresponds to pathway enrichment  
1215 among genes more highly expressed in WT mice. (D) Average, scaled logCPM expression  
1216 estimates across genes in the mTORC1 signaling pathway and (E) the oxidative phosphorylation  
1217 pathway in IAV-infected splenic NK cells of WT and *CypD*<sup>-/-</sup> mice. (F-I) Oxygen consumption of  
1218 naïve purified splenic NK cells as detailed in Figure 3I-P. Statistical differences were assessed in  
1219 G-I by Student's T-test. Refers to **Figure 3**.

1220  
1221 **Supplementary Figure 4: Kinetics of recruited NK cells and NK cell hematopoiesis in the**  
1222 **bone marrow of WT and *CypD*<sup>-/-</sup> mice.** (A-E) Mice were infected with 50 PFU of IAV. The  
1223 percentage of CCR2-expressing NK cells in the lung (A) and blood (B). (C) Differential expression  
1224 of CD49b and CD49a in the lung, with a representative FACS plot on the left and quantified on  
1225 the right. (D-E) Activation status of NK cells in the blood in uninfected (D; representative FACS  
1226 plot on the left) and day 3 (E) post-infection. (F-O) Mice were infected with 50 PFU of IAV and  
1227 phenotyped by flow cytometry. Frequencies of LKS (F) and CLPs (G) following infection were  
1228 determined as well as frequencies (left panels) and total cell counts (right panels) of CMPs (H)  
1229 and GMPs (I). Relative activation states of naïve NK cells in the BM (J), as well as the percentage  
1230 (left panels) and total cell counts (right panels) of Ki67-expressing pre-NKPs (K) and NKPs (L).  
1231 Level of expression of p53 in NK cells in the bone marrow (M) and BAL (N) at day 5 post-

1232 infection. (O) Representative FACS plot (left panel) and quantification (right panel) of cell death  
1233 in pre-NKPs as determined by AnnexinV and NucSpot staining. Symbols indicate an individual  
1234 mouse and B, D, F-I, K-L and O are compilations of two individual experiments and A, C, E, J,  
1235 M-N are one representative experiment of two. Statistical differences were assessed by Two-way  
1236 ANOVA followed by Sidak's multiple comparisons test for all panels, except for N where a Two-  
1237 tailed Student's T-test was performed. Refers to **Figures 5 and 6**.

1238  
1239 **Supplementary Figure 5: Disease tolerance is mediated by IL-22 and not IFN- $\gamma$  following**  
1240 **IAV infection.** (A-K) Mice were infected with 50 PFU of IAV. (A) The frequency of IFN- $\gamma$ -  
1241 producing splenic NK cells at day 5 post-infection. (B-D) WT and *Ifngr*<sup>-/-</sup> mice were infected and  
1242 the levels of protein (B), erythrocytes (C) and total cells (D) in the BAL at 7 days post-infection  
1243 were determined. Following administration of recombinant IFN- $\gamma$ , levels of protein (E) and  
1244 erythrocytes (F) were assessed in the BAL. (G-I) WT and IL-22-deficient mice were infected and  
1245 amount of protein (G) and number of cells (H) were enumerated, as well as pulmonary  
1246 inflammation by hematoxylin and eosin staining (I; scale bar = 30 $\mu$ M). (J) Frequency of IL-22-  
1247 producing NK cells in the spleens of WT and CypD-deficient mice at 5 and 7 days post-IAV  
1248 infection. In all panels except I and K, symbols represent an individual mouse. In I, micrographs  
1249 are a representative image taken from one of four mice. In K quantification is done from 10 random  
1250 micrographs and each symbol represents one micrograph. In A and J, data are taken from one  
1251 experiment that is representative of three. In B-H, panels are a compilation of two individual  
1252 experiments. Differences were determined as follows: in A-D, G-H Two-tailed Student's T-test;  
1253 in E, F, K Two-way ANOVA followed by Tukey's multiple comparisons test or Sidak's (J). Refers  
1254 to **Figure 7**.

1255 **Supplementary Table 1: RNA-Seq sample meta-data**

1256 **Supplementary Table 2: CypD knockout effect on gene expression**

1257 **Supplementary Table 3: Gene set enrichment analysis in WT and *CypD*<sup>-/-</sup> NK cells**

1258

**FIGURE 1.**

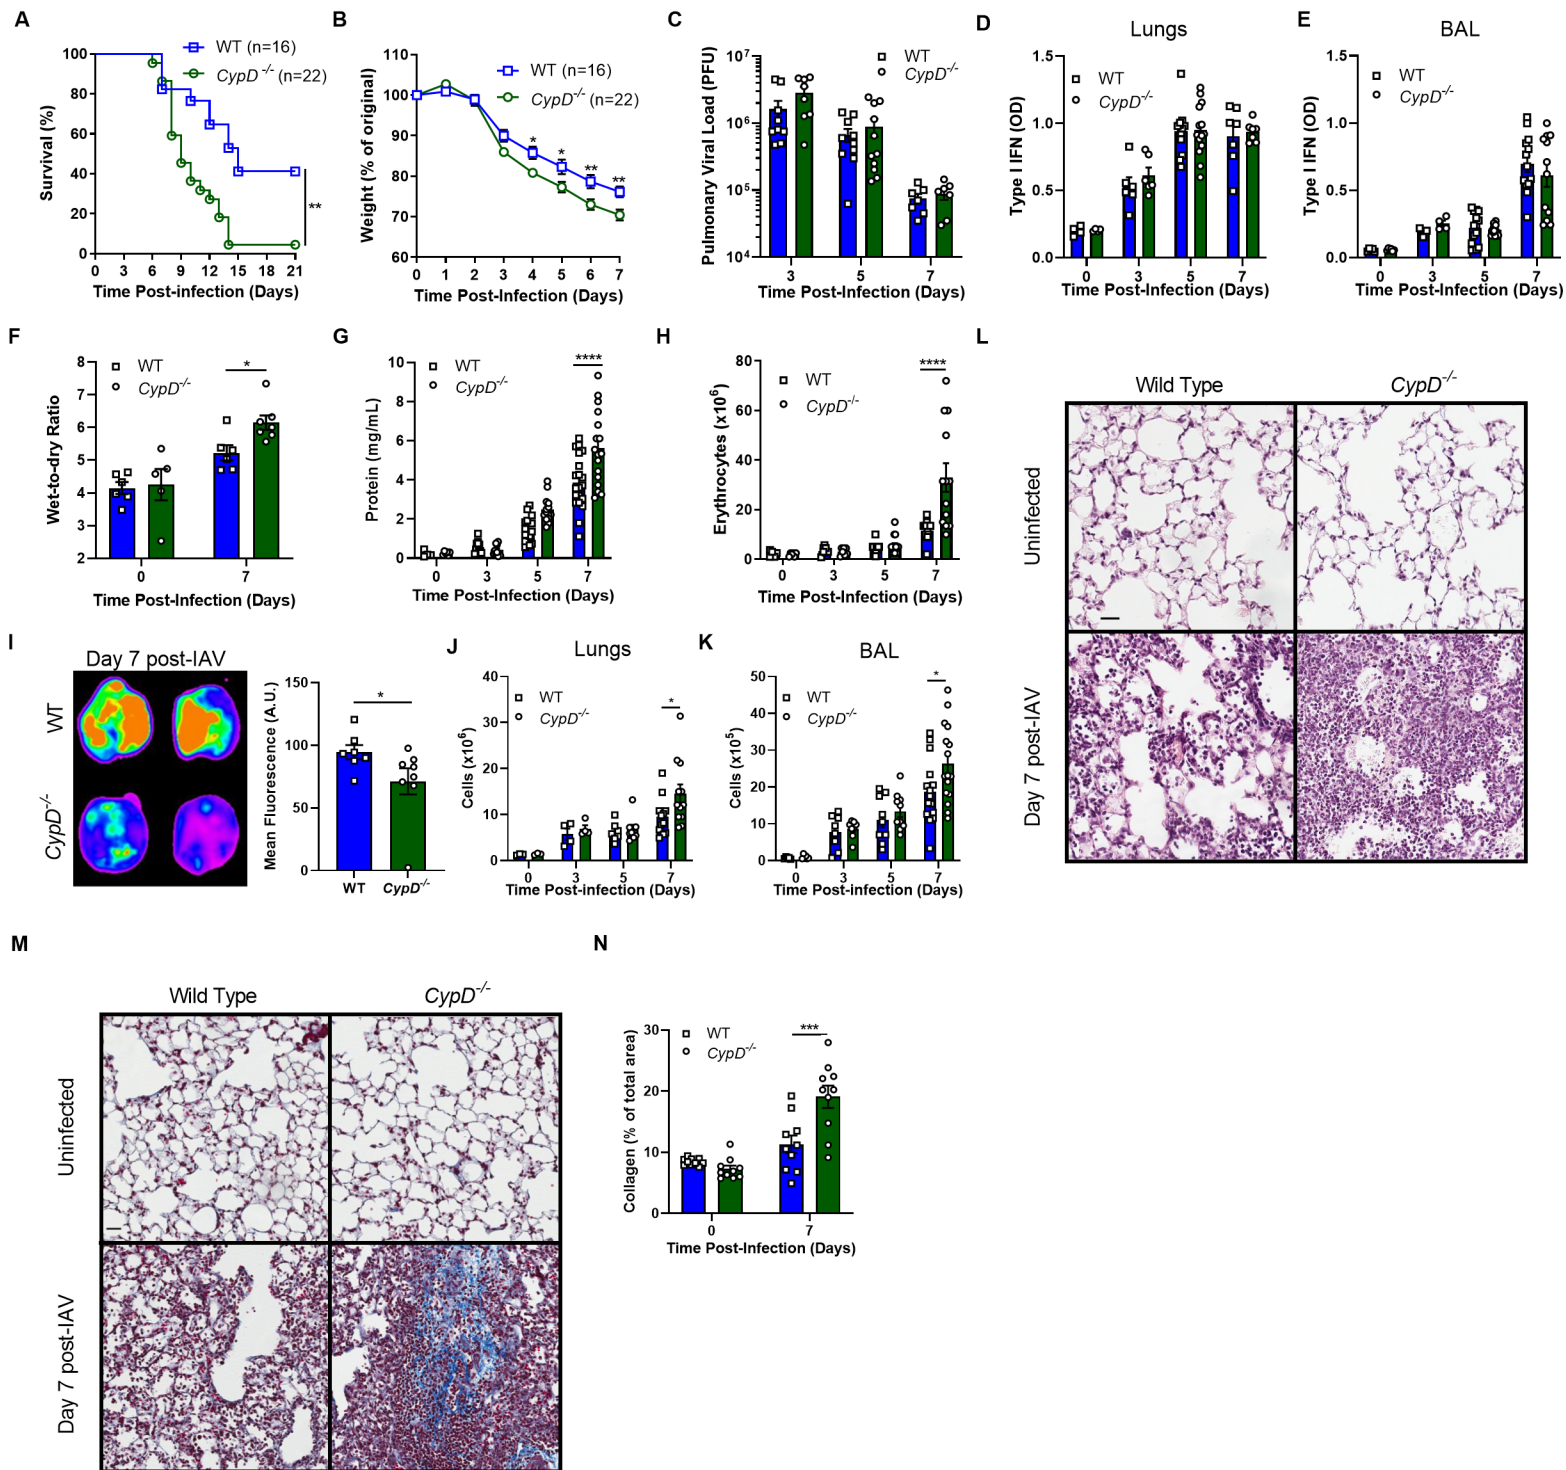

**FIGURE 2:**

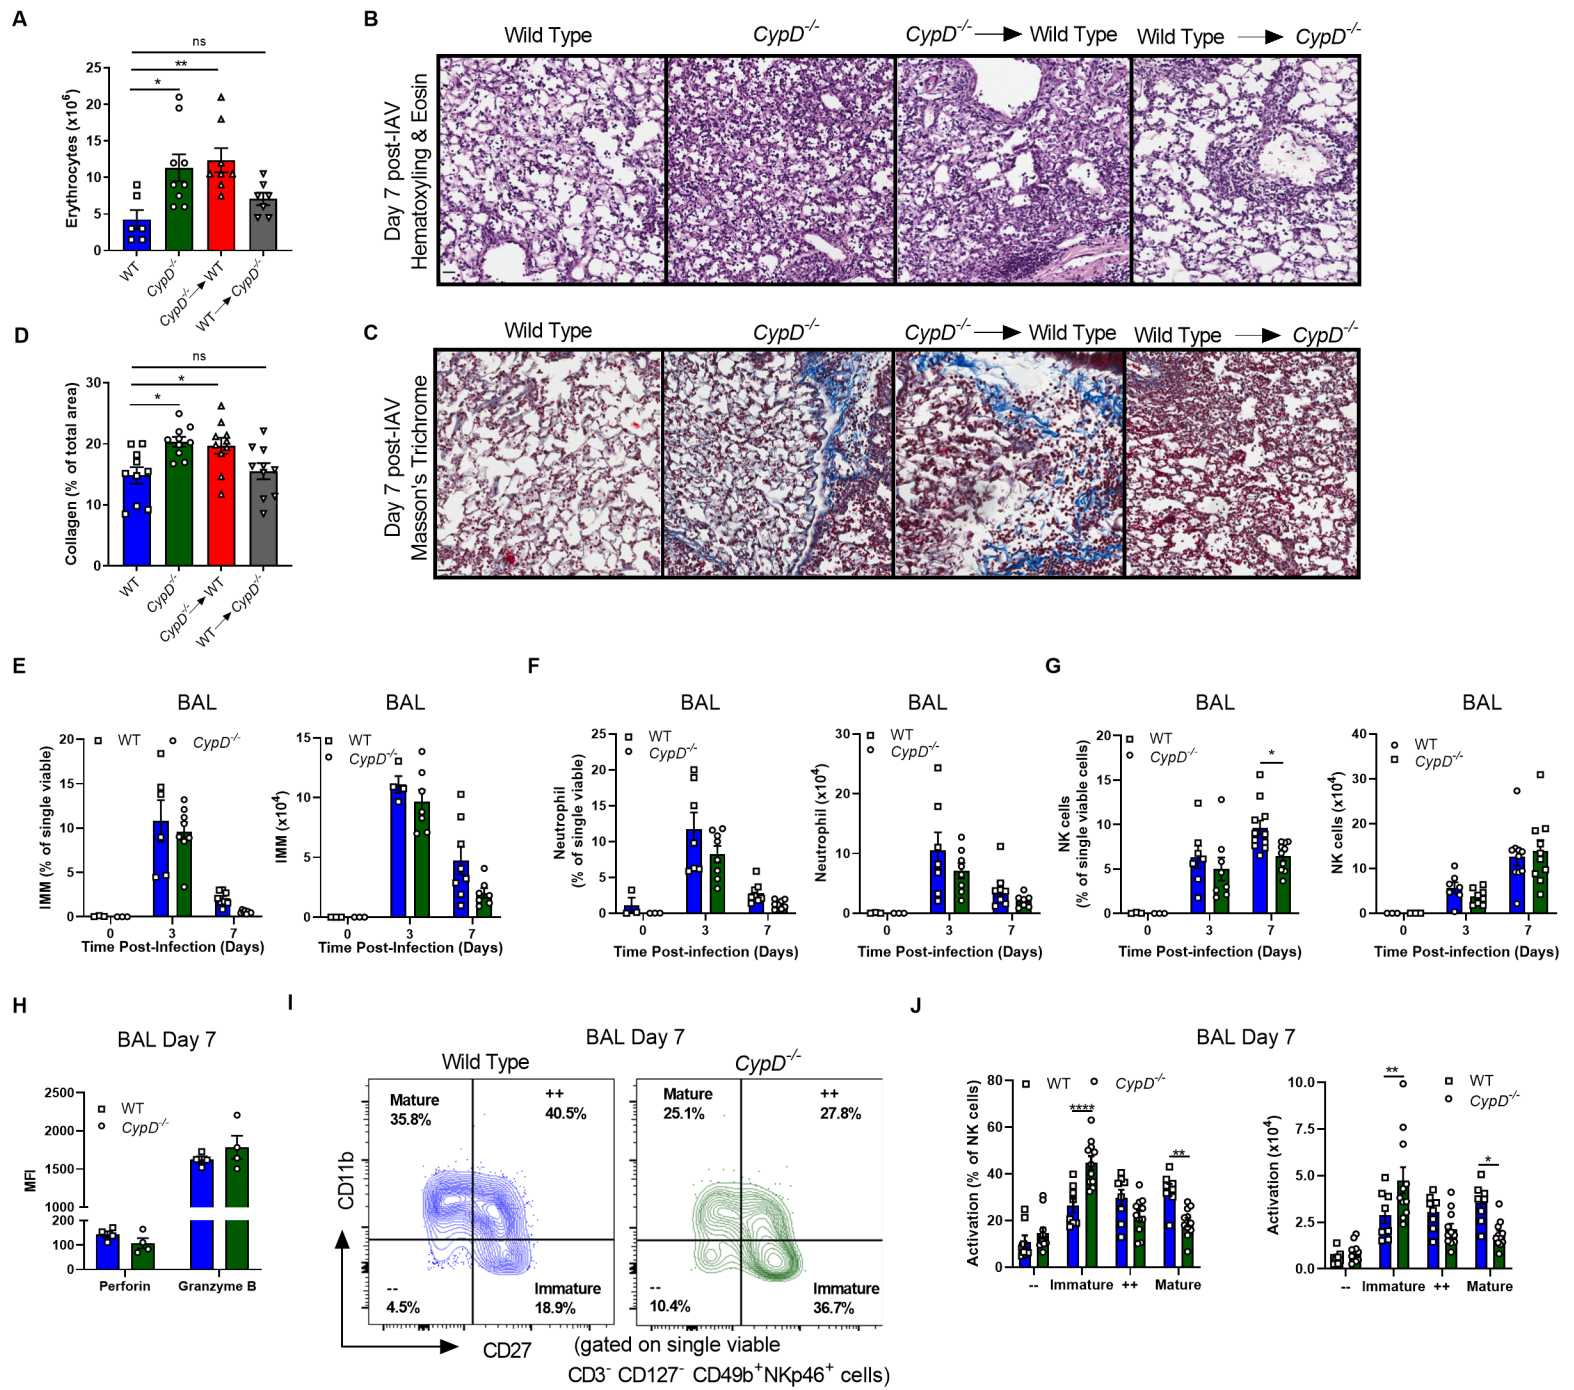

**FIGURE 3:**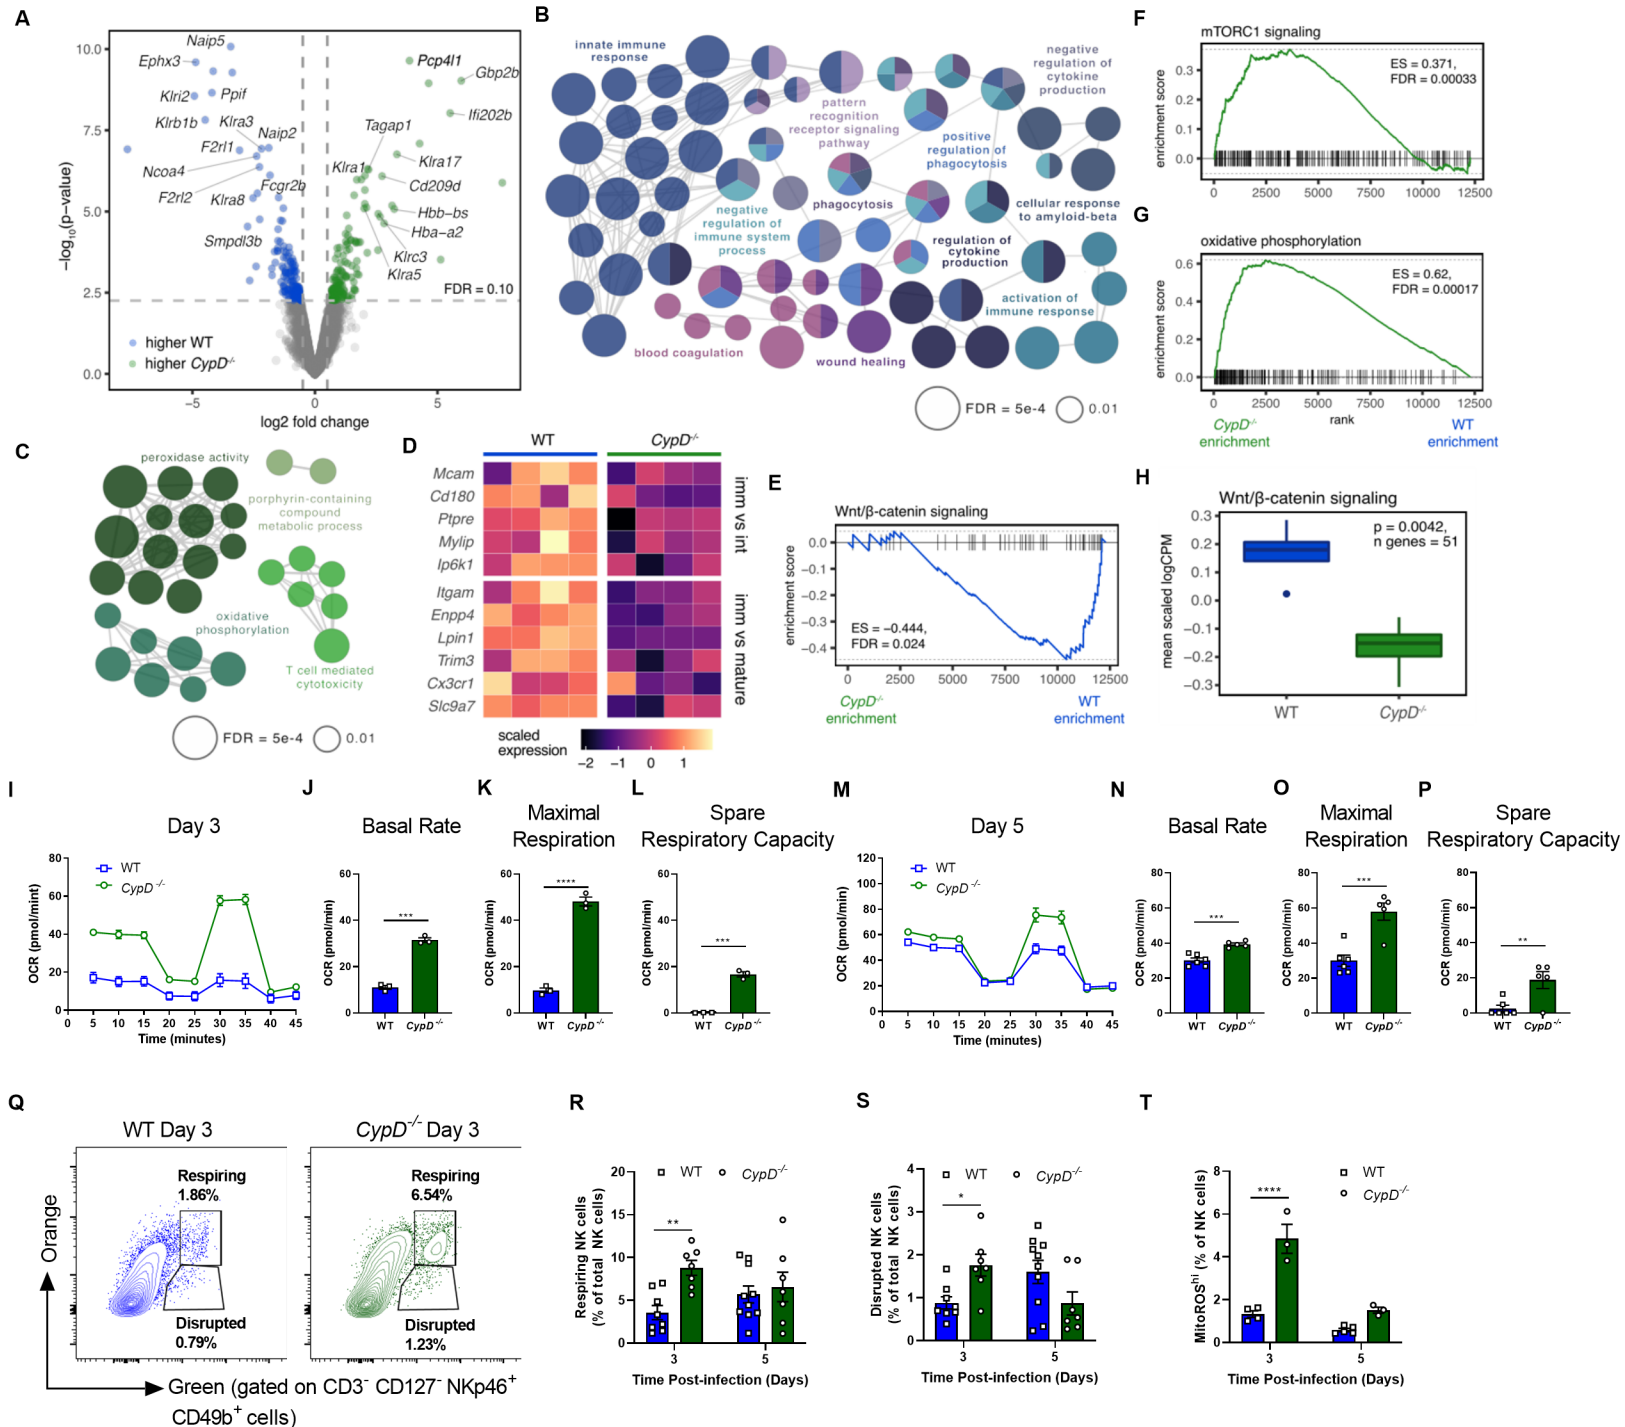



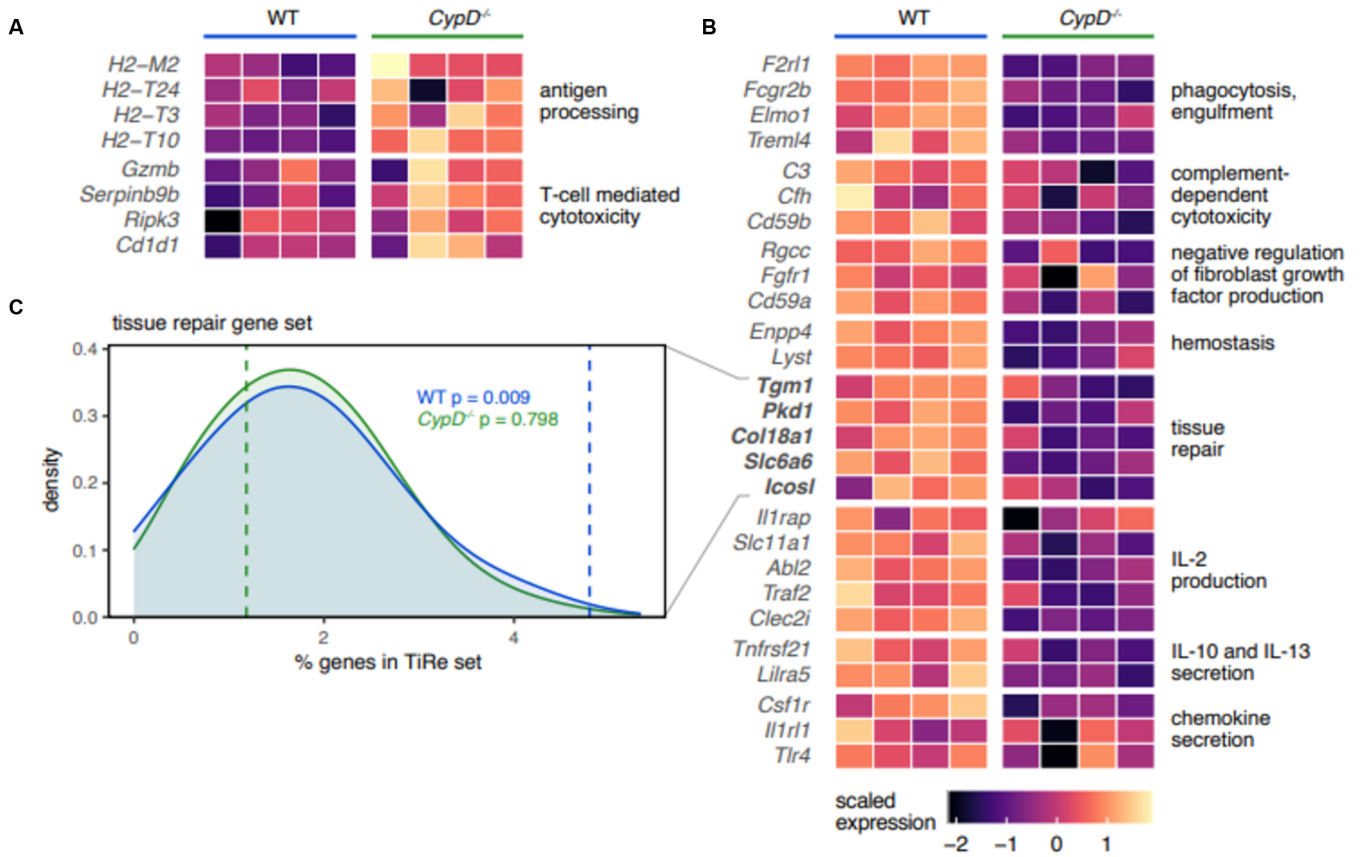

**FIGURE 5:**

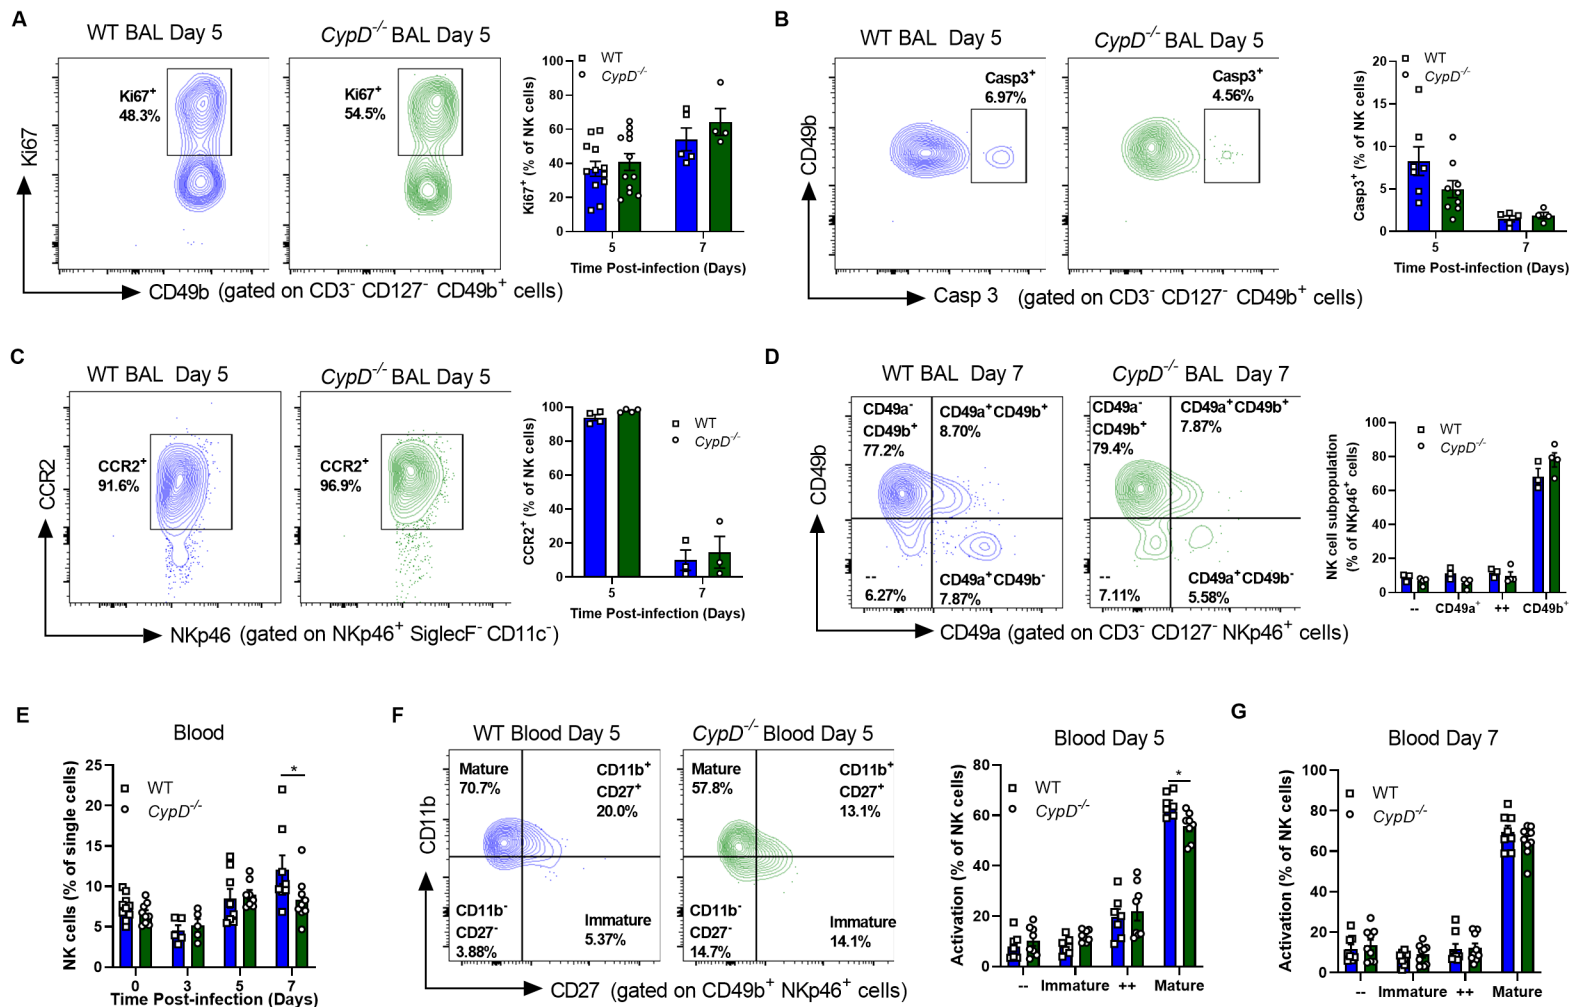

**FIGURE 6:**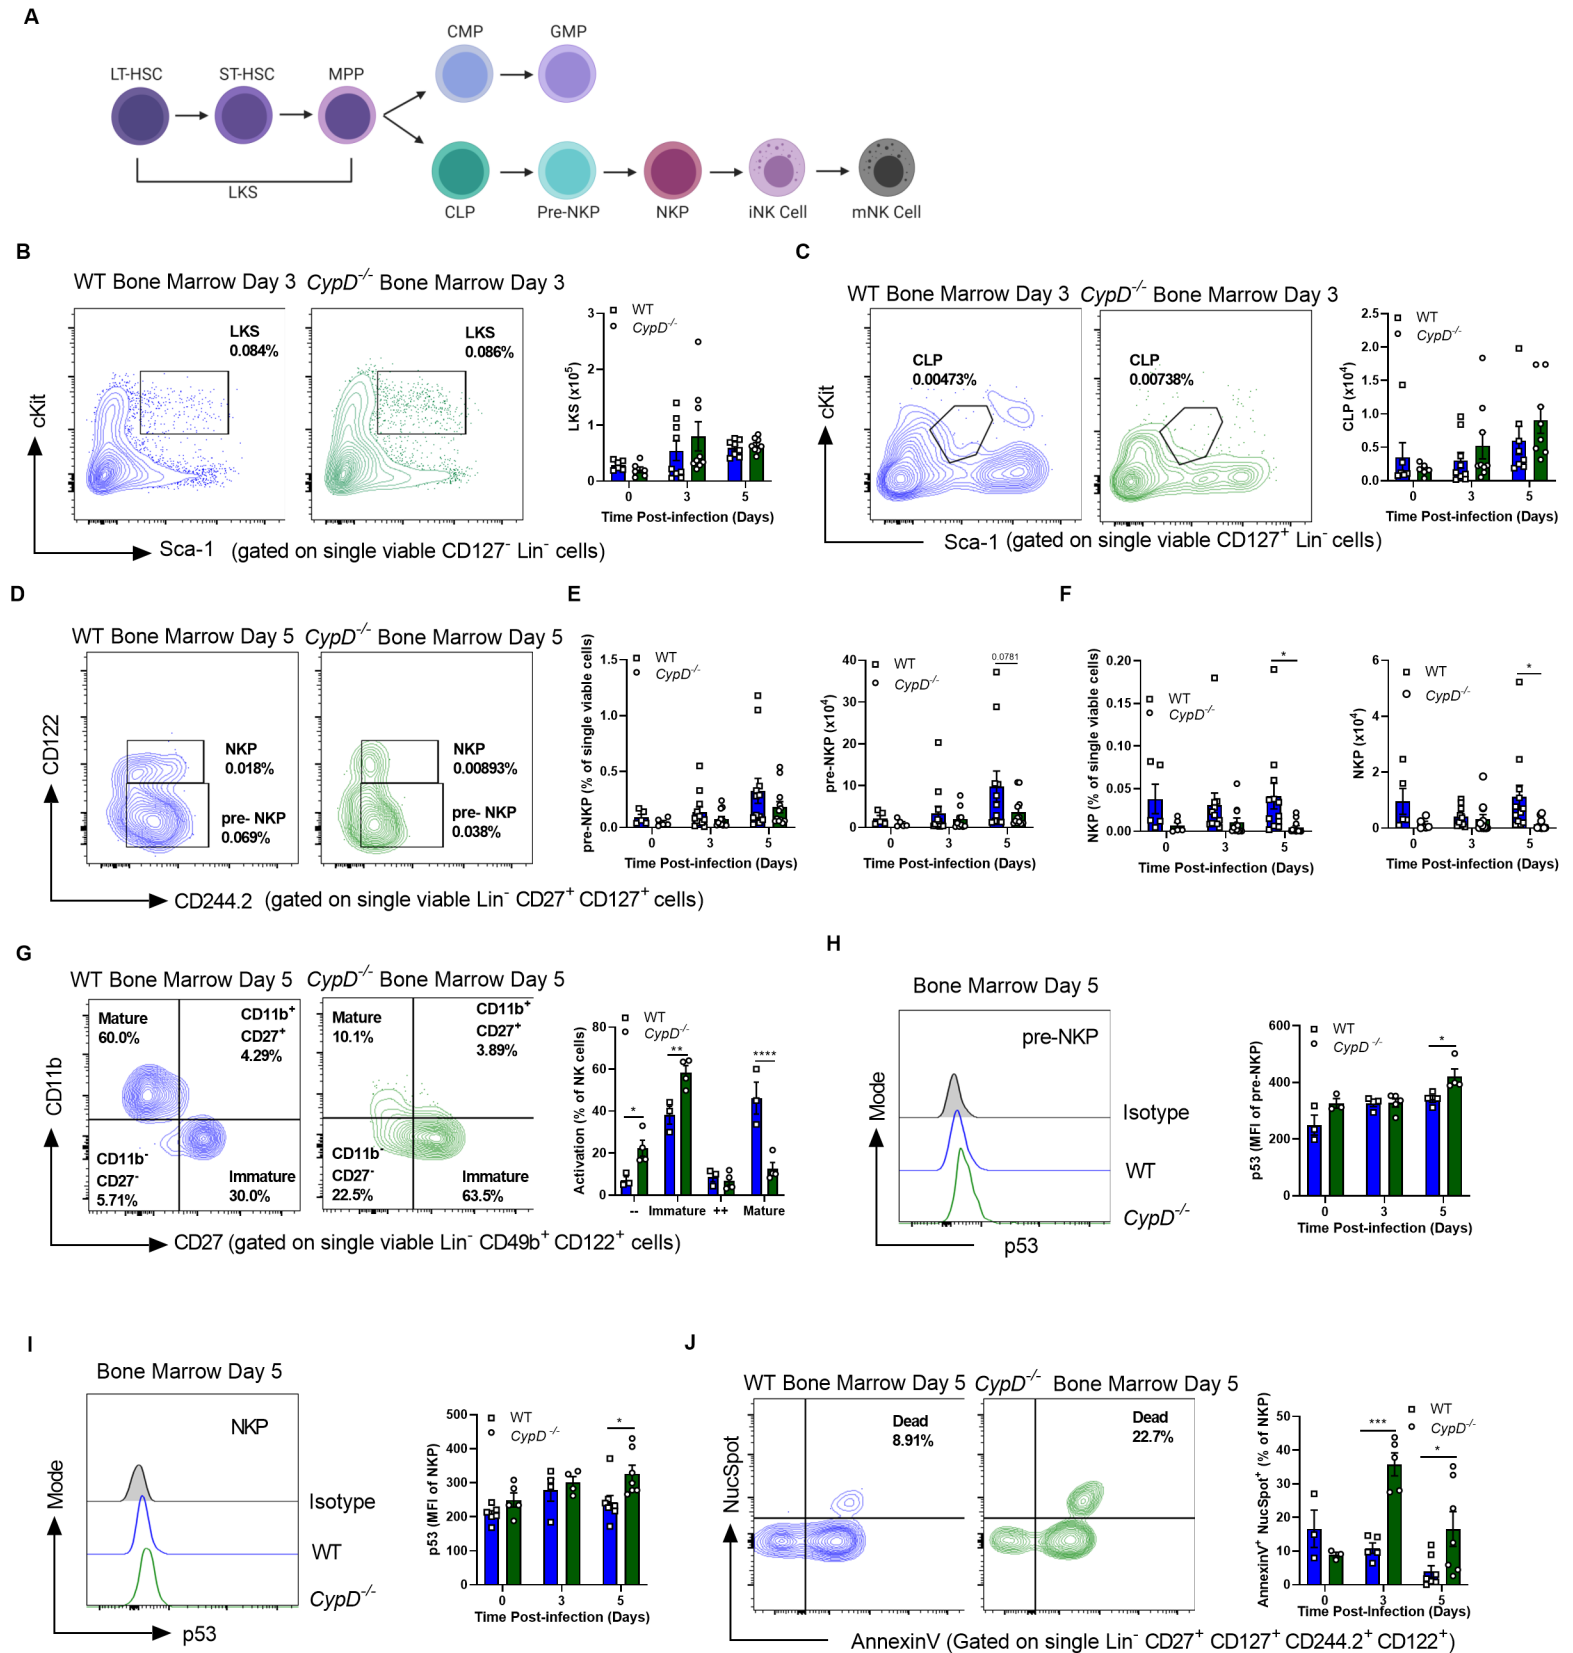

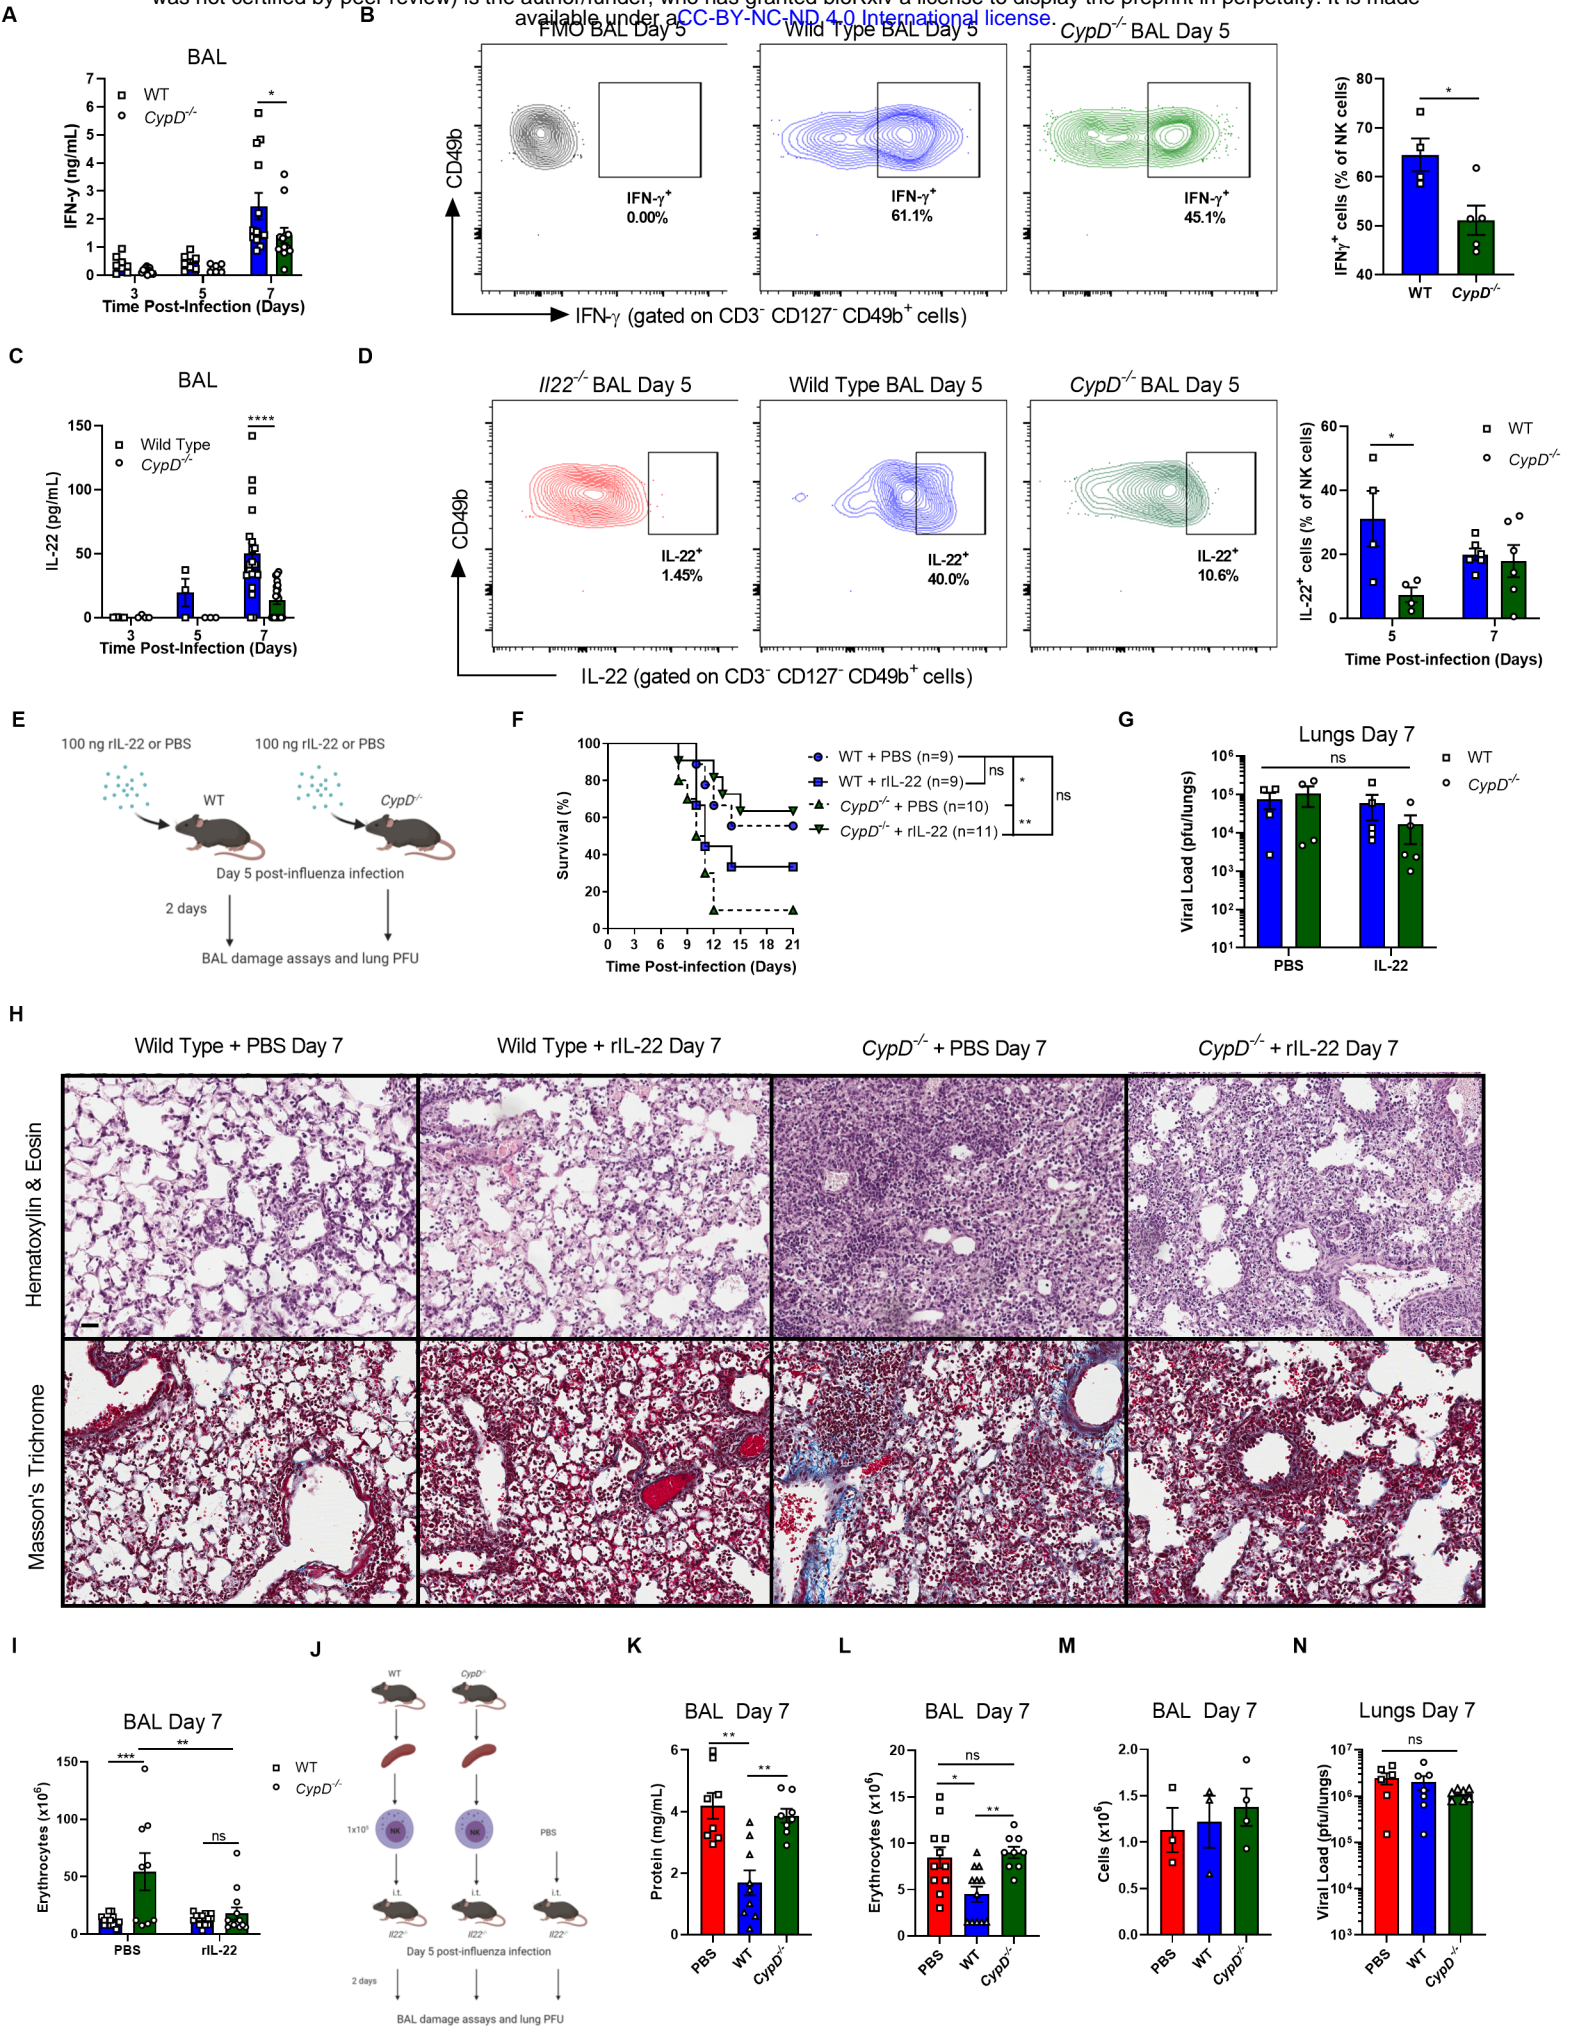

**Figure S1**

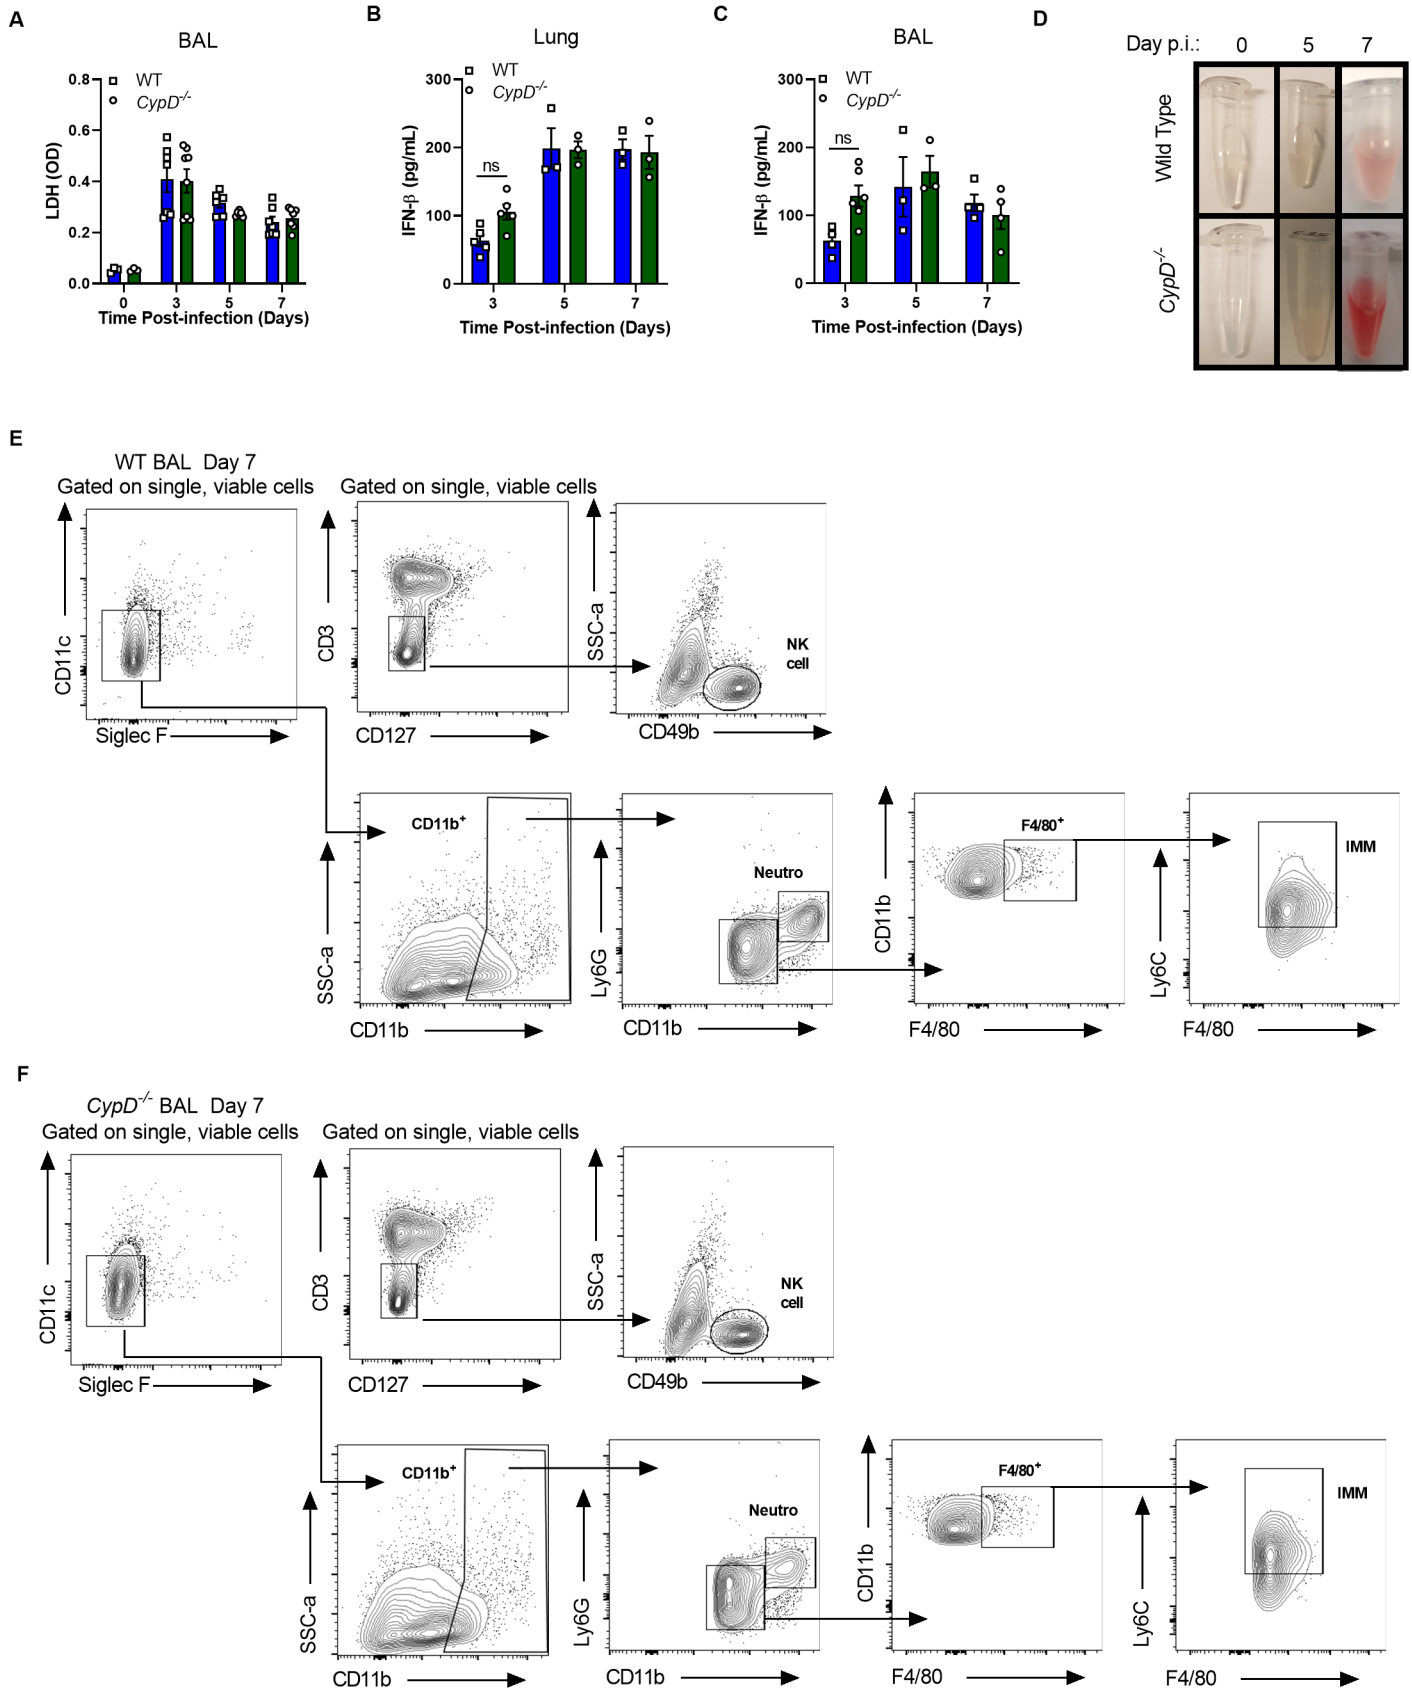

# SUPPLEMENTARY FIGURE 2:

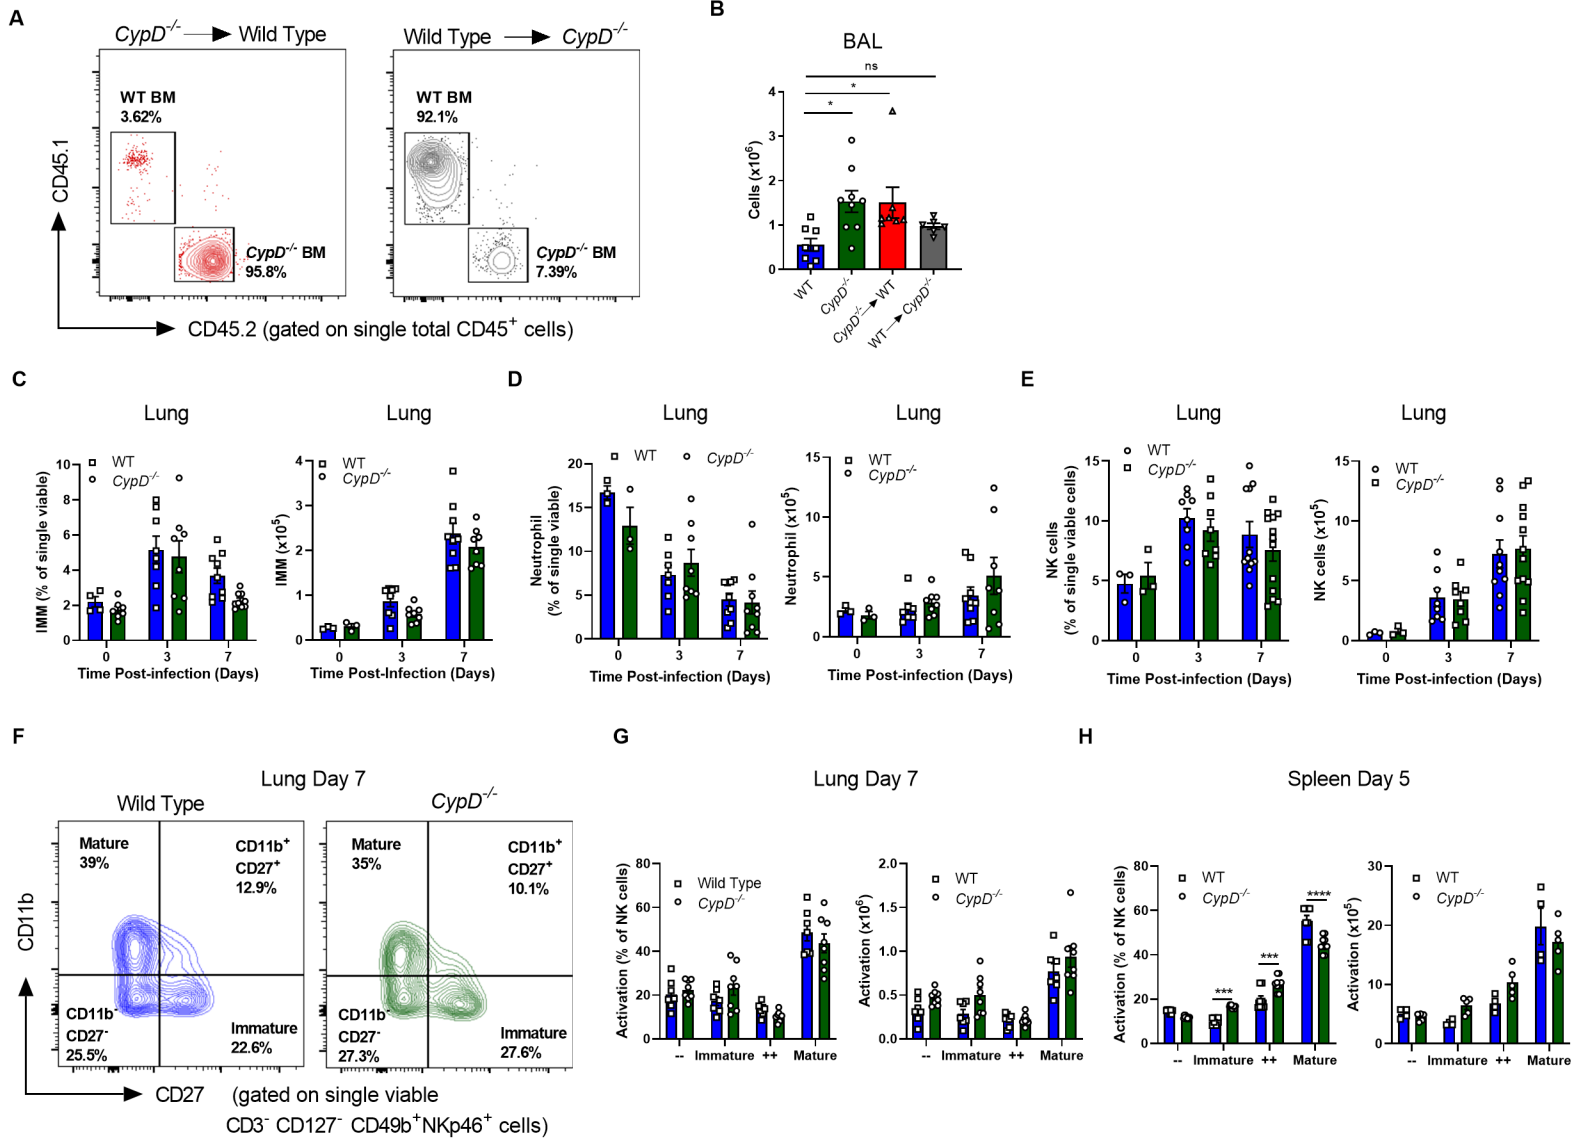

# SUPPLEMENTARY FIGURE 3:

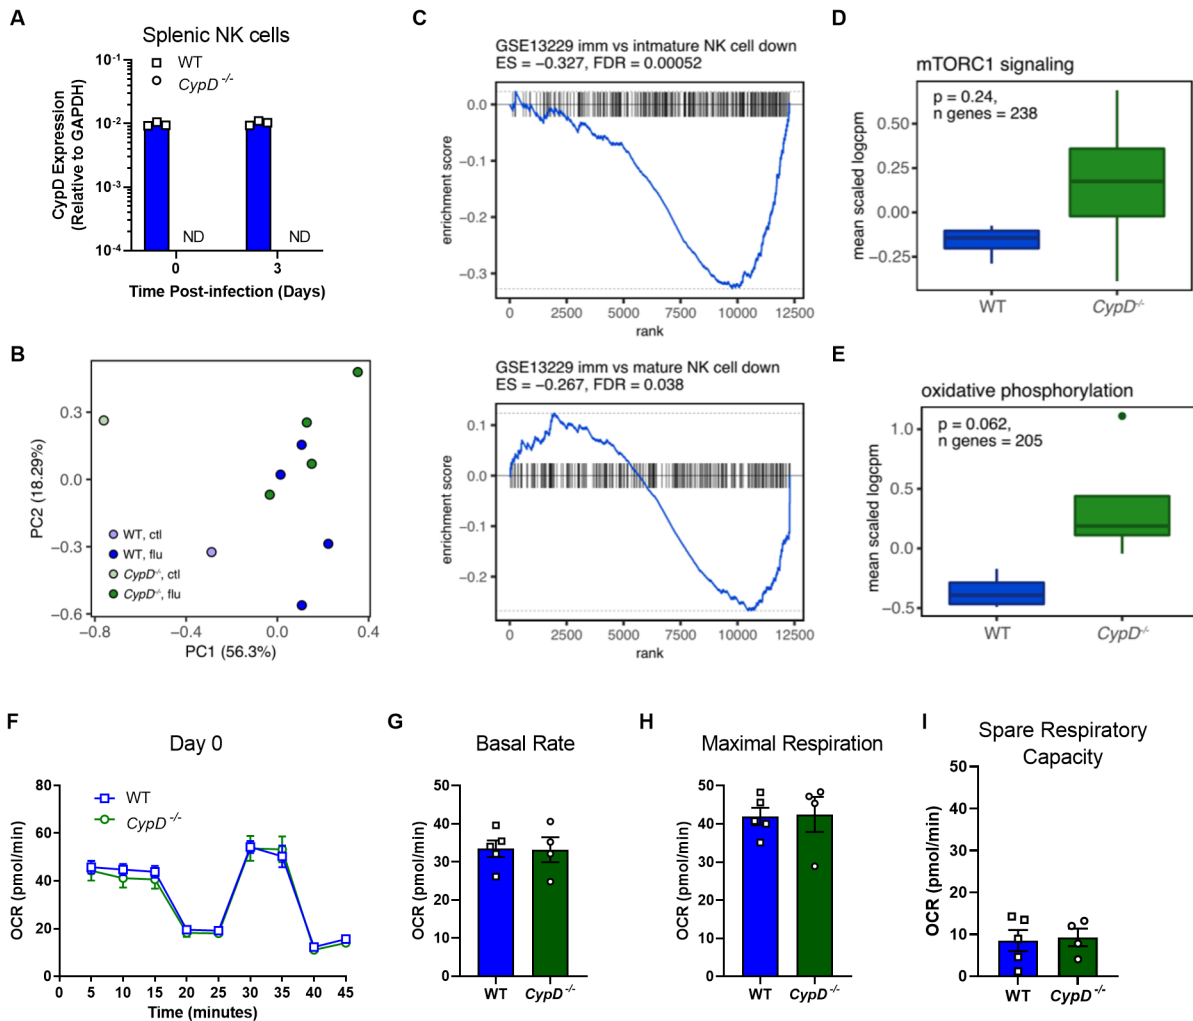

**SUPPLEMENTARY FIGURE 4:**

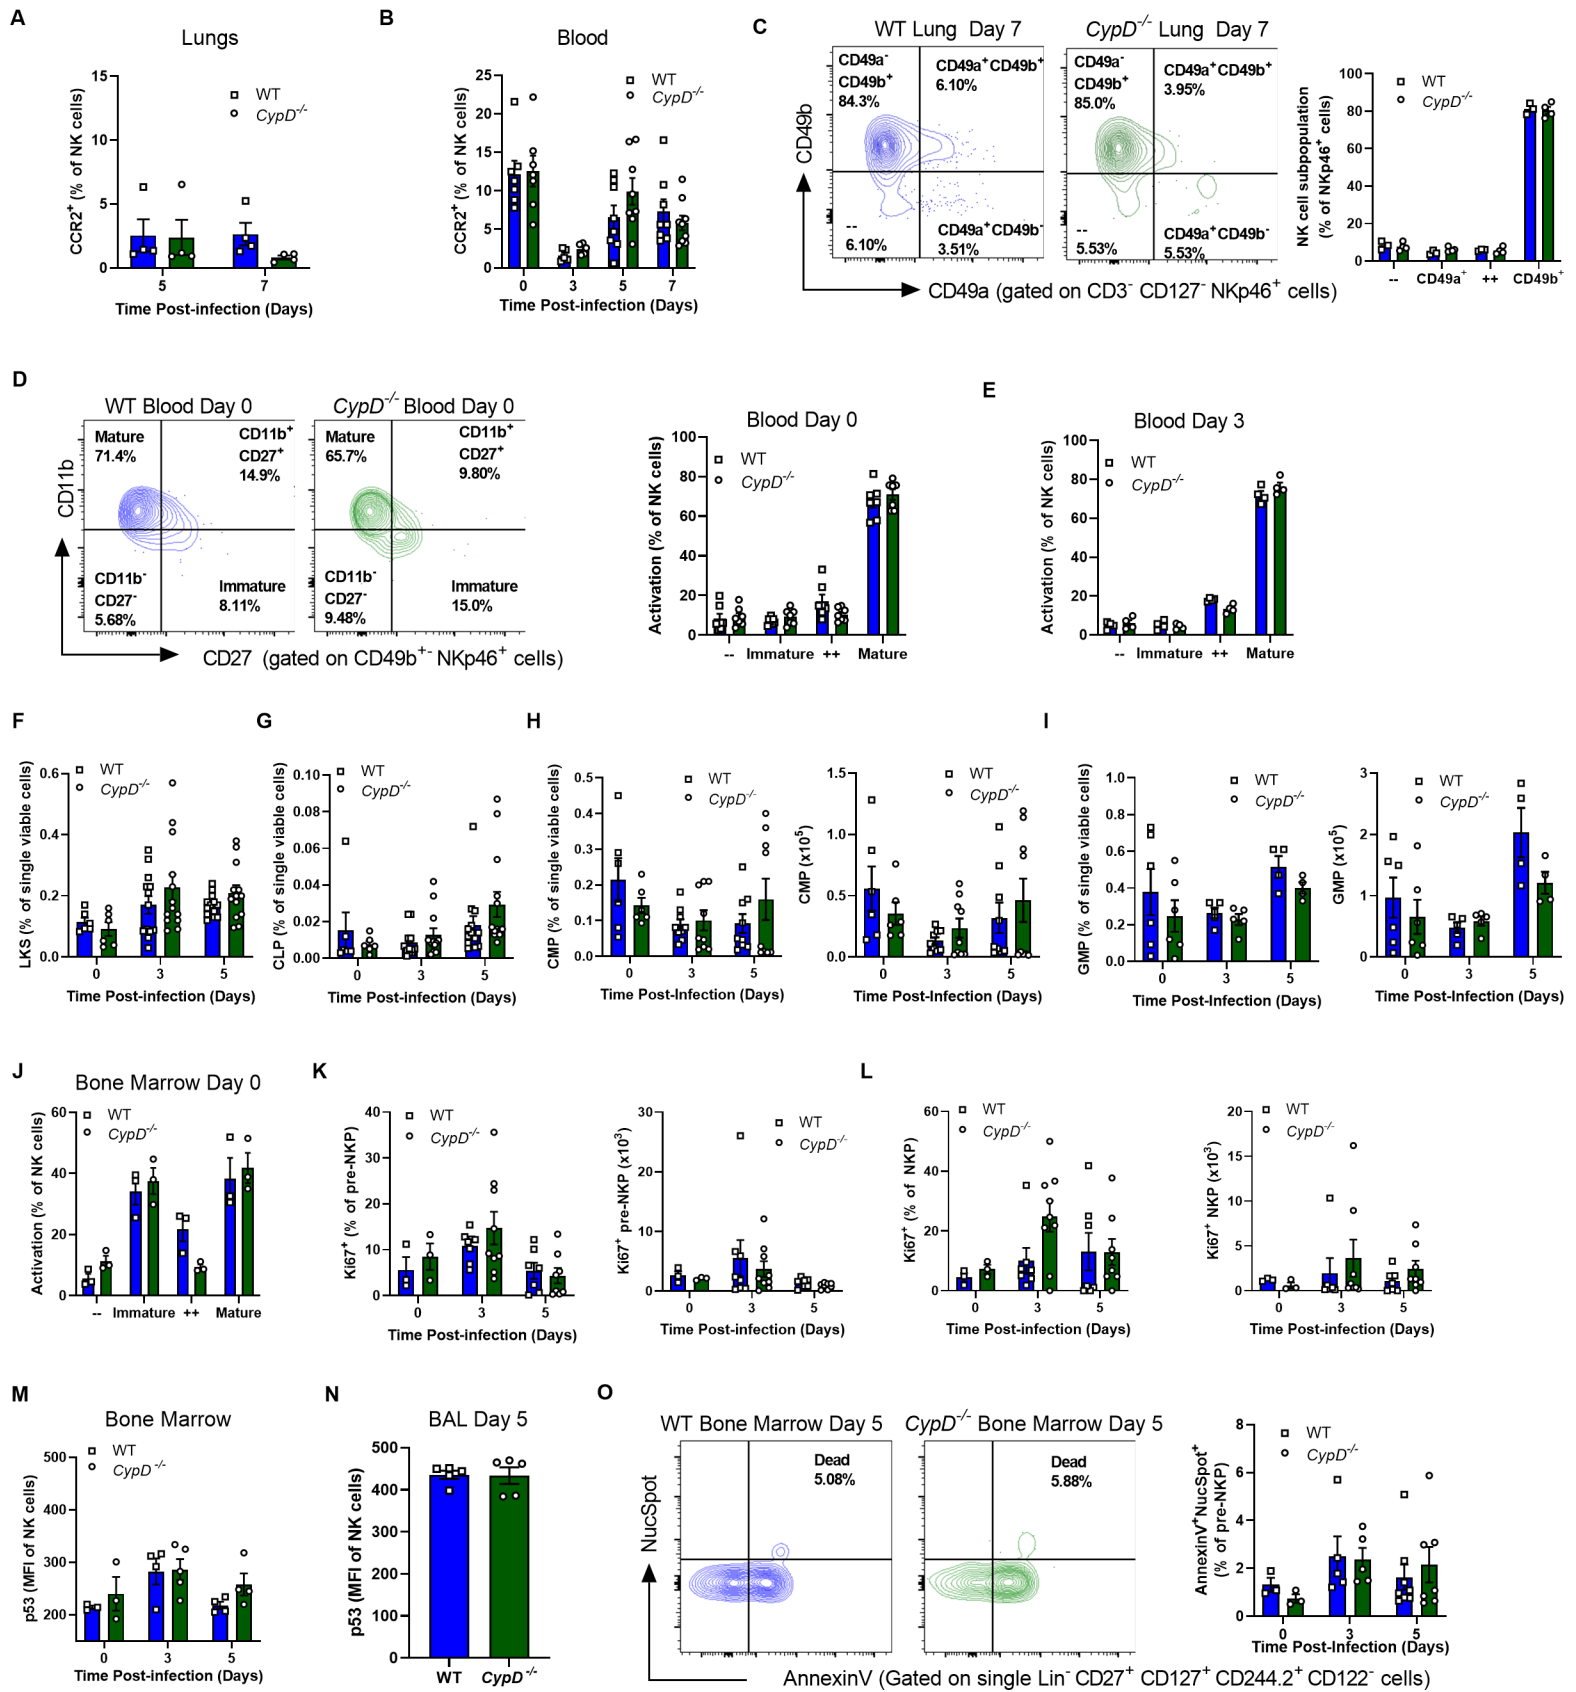



**SUPPLEMENTARY FIGURE 5:**

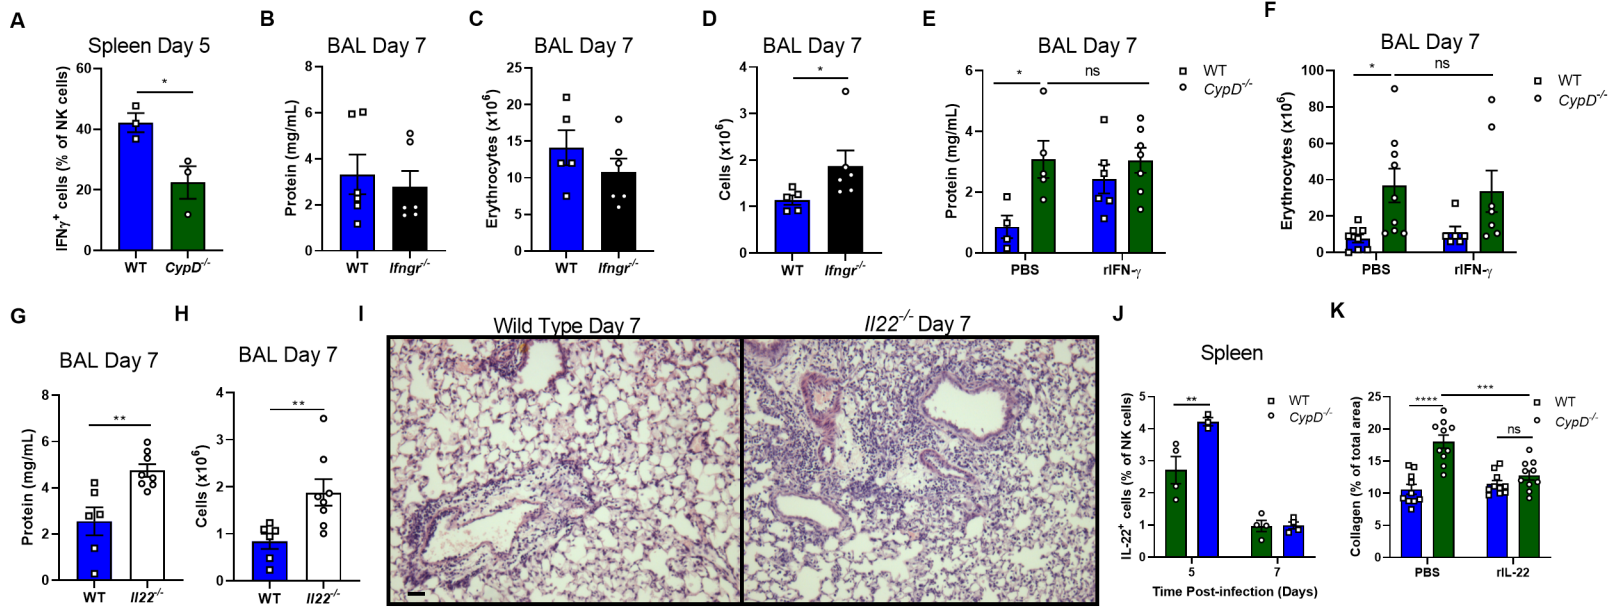

Source: http://biorxiv.org/content/10.1101/2021.05.28.445832v1.full.pdf
